# Supplementary material for: Evaluation of 4‐(4‐Fluorobenzyl)piperazin‐1‐yl]‐Based Compounds as Competitive Tyrosinase Inhibitors Endowed with Antimelanogenic Effects
Source: PubMed Central journal article supplement (PMC8518915; doi:10.1002/cmdc.202100396), 2021-07-26
Supplement: CMDC-16-3083-s001.pdf [file CMDC-16-3083-s001.pdf]

# ChemMedChem

Supporting Information

## **Evaluation of 4-(4-Fluorobenzyl)piperazin-1-yl]-Based Compounds as Competitive Tyrosinase Inhibitors Endowed with Antimelanogenic Effects**

Salvatore Mirabile, Serena Vittorio, Maria Paola Germanò, Ilenia Adornato, Laura Ielo, Antonio Rapisarda, Rosaria Gitto, Francesca Pintus, Antonella Fais, and Laura De Luca\*

## Supporting Information:

### Content:

|                                                                                                                            |     |
|----------------------------------------------------------------------------------------------------------------------------|-----|
| <b>Figure S1:</b> Ramachandran plot of hTYR homology model.....                                                            | S2  |
| <b>Figure S2-S42:</b> <sup>1</sup> H-NMR and selected representative <sup>13</sup> C-NMR spectra.....                      | S3  |
| <b>Figure S43:</b> Representation of AbTYR binding site.....                                                               | S24 |
| <b>Figure S44:</b> Representation of hTYR binding site .....                                                               | S25 |
| <b>Figure S45:</b> Sequence alignment of hTYR and (TYRP-1) mutant (T391V-R374S-Y362F).....                                 | S26 |
| <b>Figure S46:</b> B16F10 melanoma cell viability after treatment with compounds <b>23</b> , <b>25</b> and <b>26</b> ..... | S27 |
| <b>Table S1:</b> CAS numbers and smiles for compounds <b>7-32</b> .....                                                    | S28 |
| <b>Table S2:</b> Selected physicochemical parameters and predicted drug-likeness properties.....                           | S29 |

Figure S1. Ramachandran plot of hTYR homology model

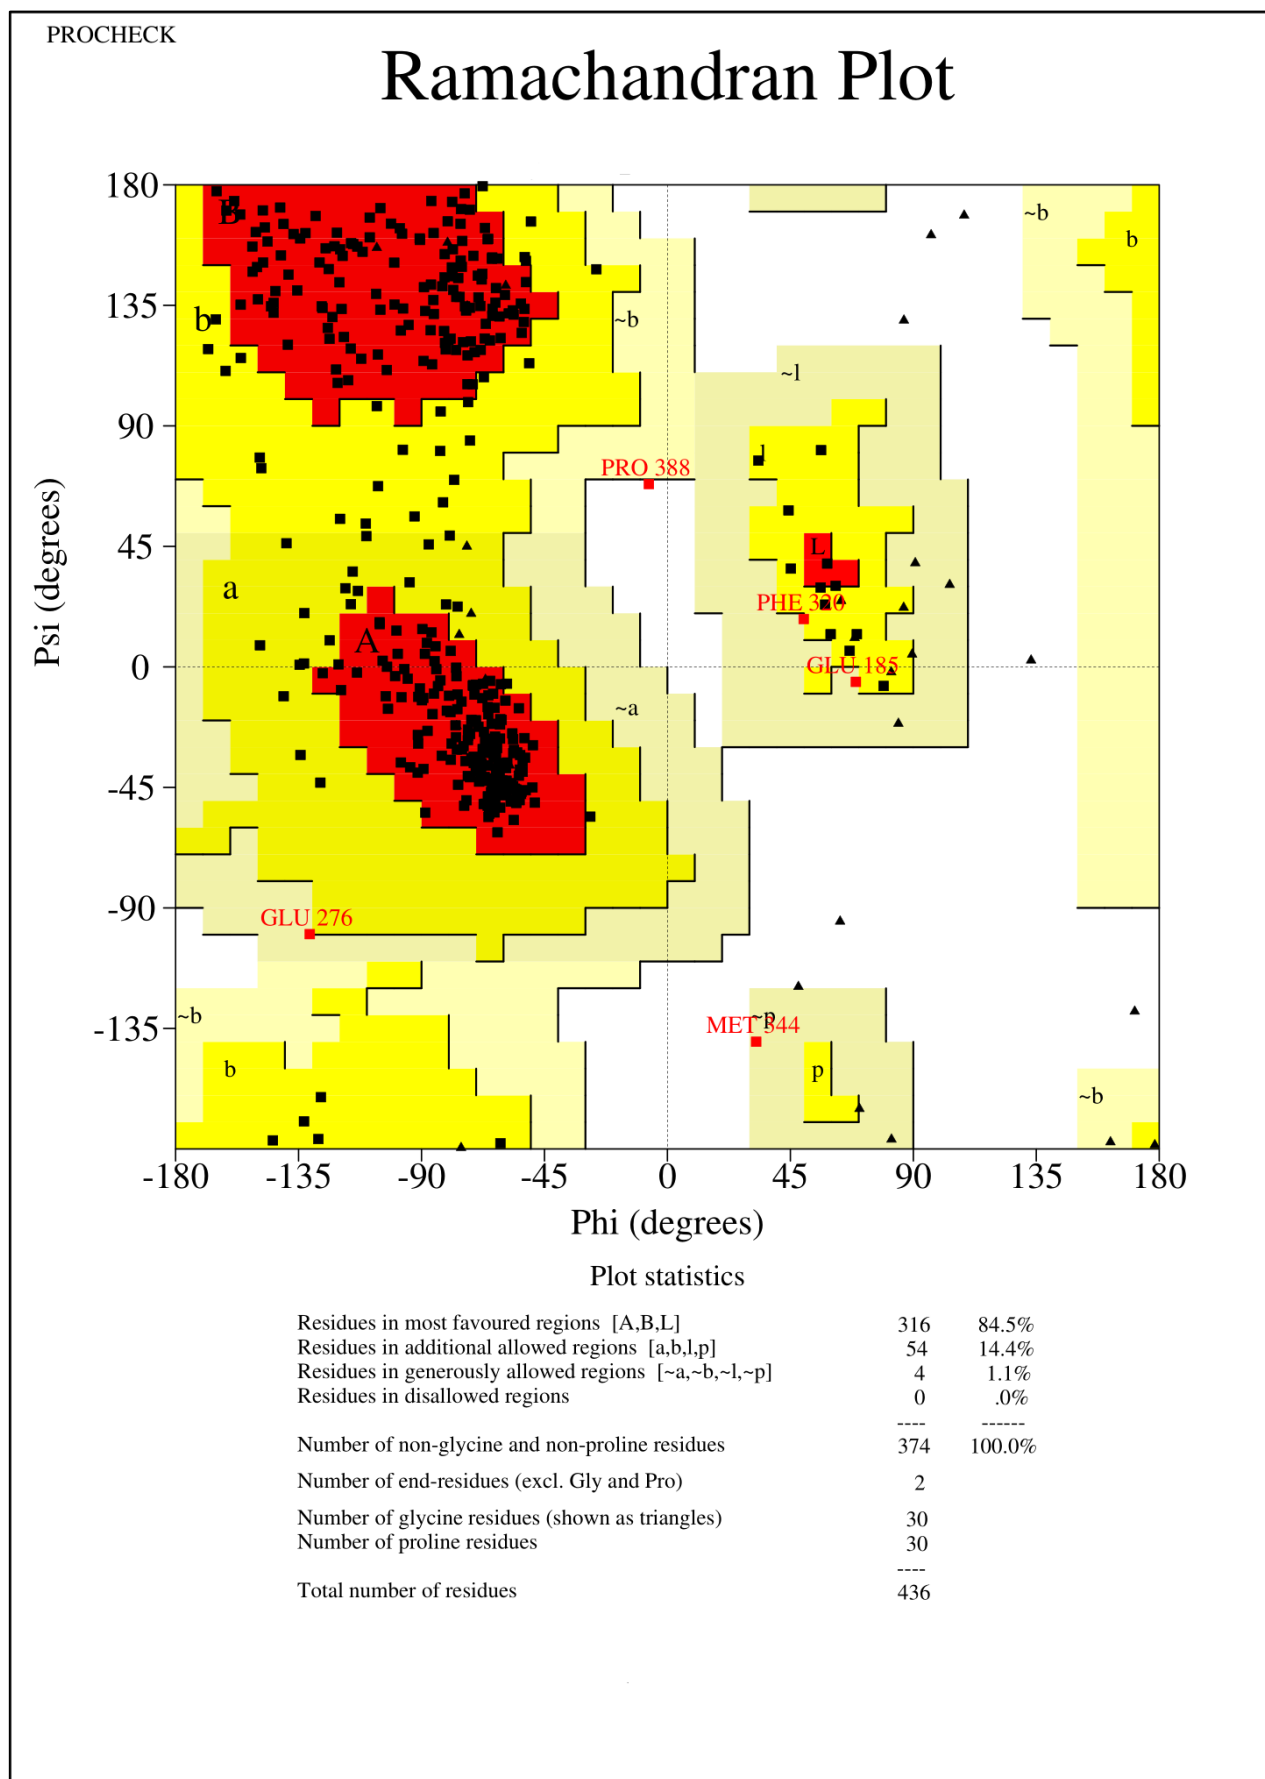

# <sup>1</sup>H-NMR and selected representative <sup>13</sup>C-NMR spectra

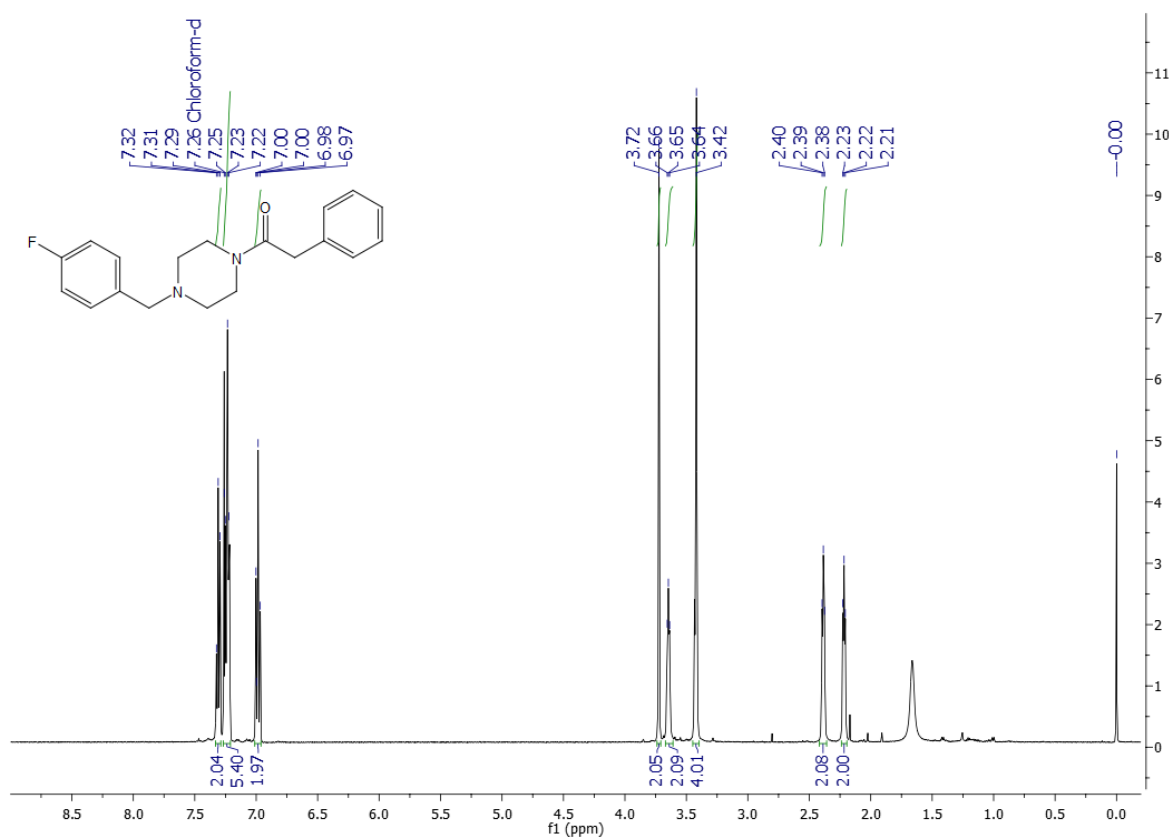

Figure S2: <sup>1</sup>H-NMR (CDCl<sub>3</sub>) spectrum of 1-[4-(4-Fluorobenzyl)piperazin-1-yl]-2-phenylethan-1-one (7)

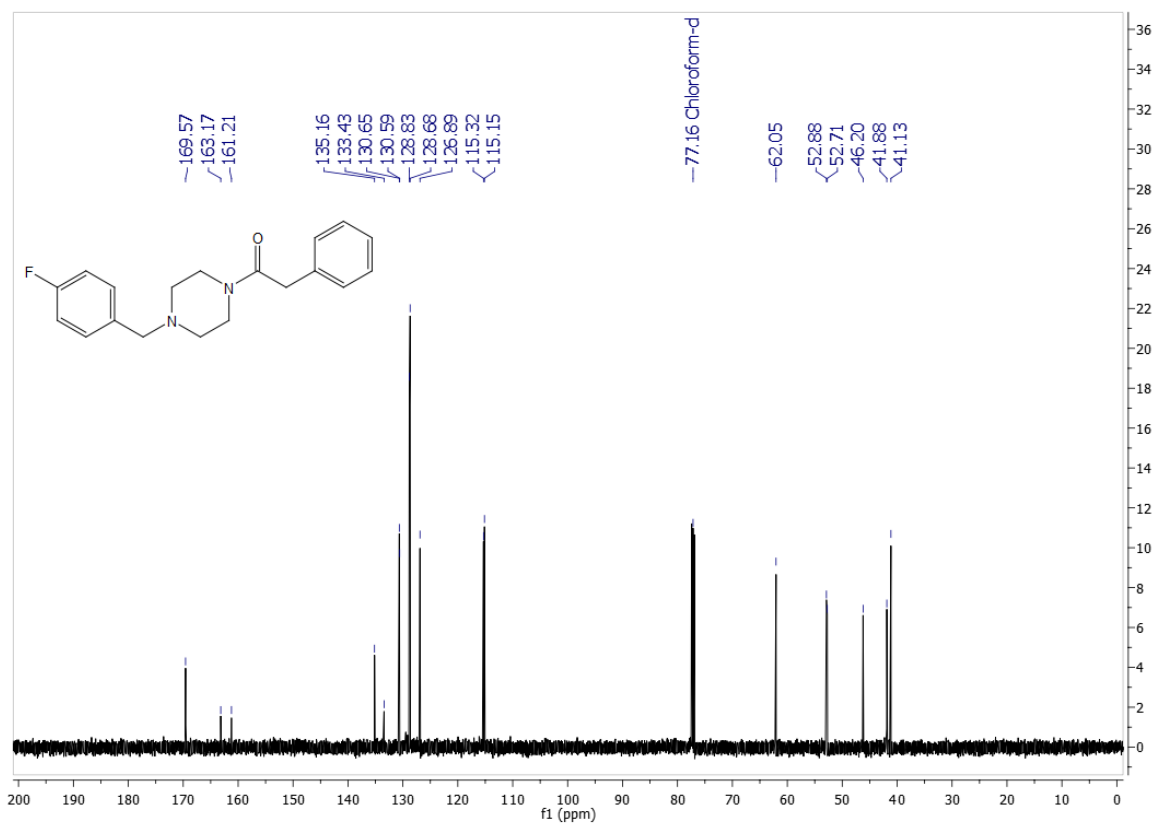

Figure S3: <sup>13</sup>C-NMR (CDCl<sub>3</sub>) spectrum of 1-[4-(4-Fluorobenzyl)piperazin-1-yl]-2-phenylethan-1-one (7)

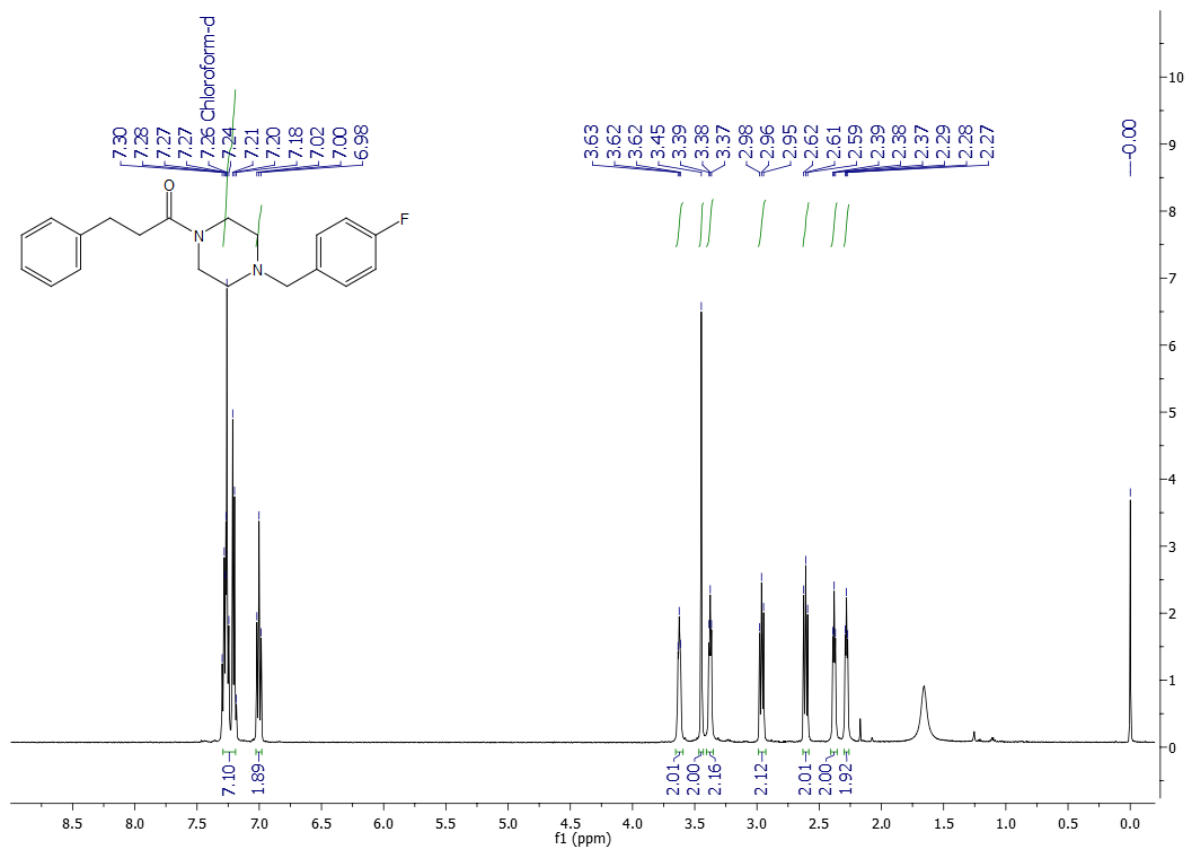

**Figure S4:** <sup>1</sup>H-NMR (CDCl<sub>3</sub>) spectrum of 1-[4-(4-Fluorobenzyl)piperazin-1-yl]-3-phenylpropan-1-one (**8**)

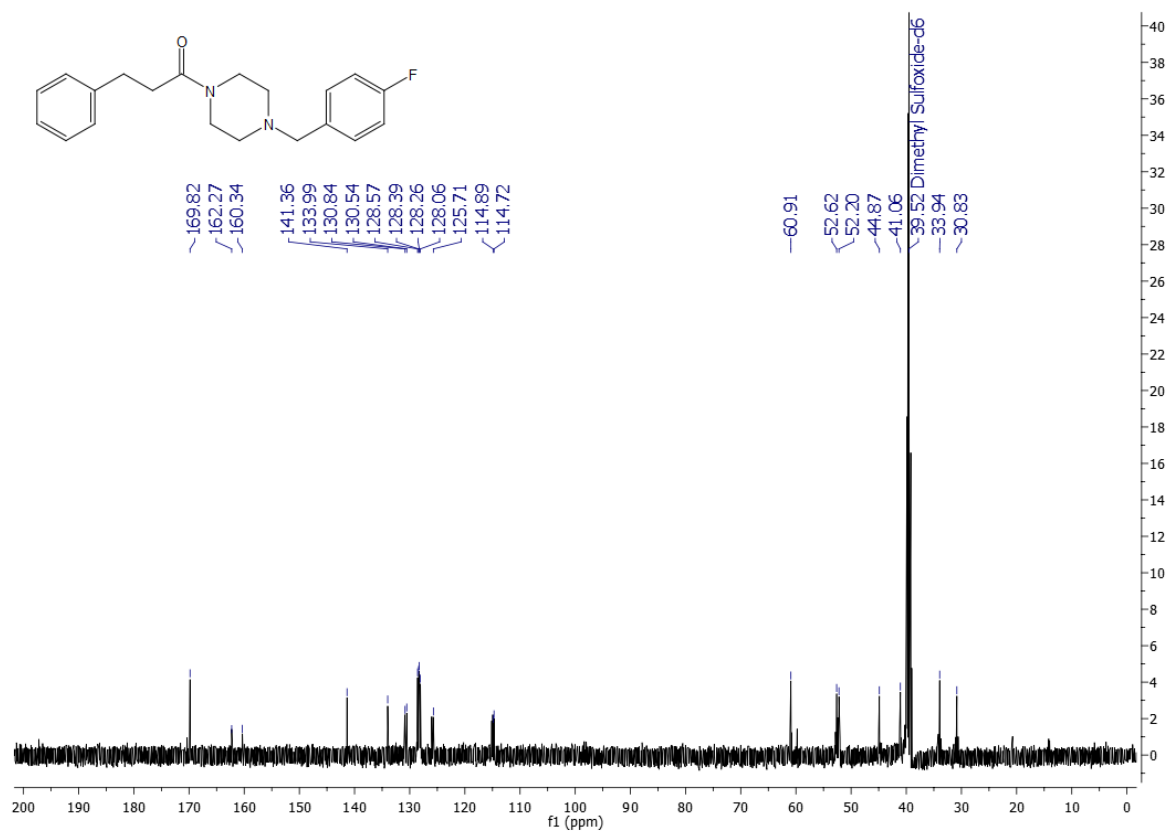

**Figure S5:** <sup>13</sup>C-NMR (DMSO-d<sub>6</sub>) spectrum of 1-[4-(4-Fluorobenzyl)piperazin-1-yl]-3-phenylpropan-1-one (**8**)

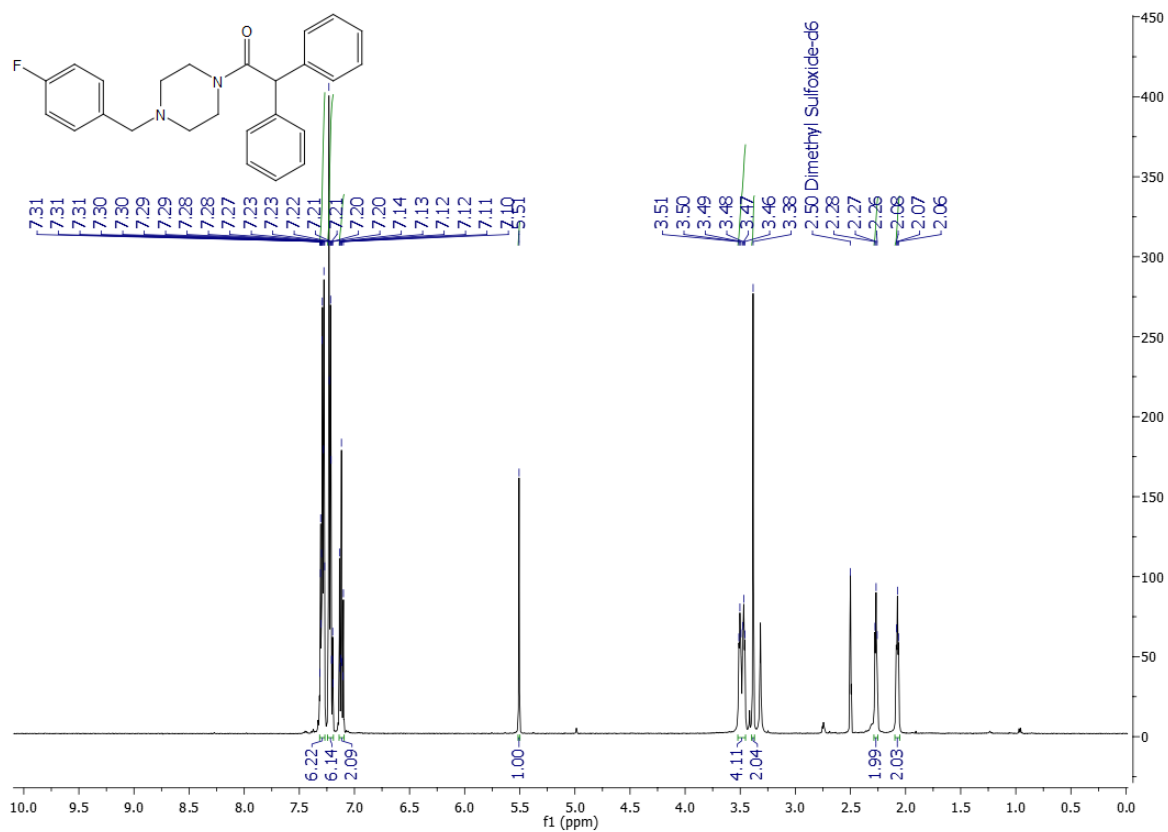

**Figure S6:**  $^1\text{H-NMR}$  (DMSO- $d_6$ ) spectrum of 1-[4-(4-Fluorobenzyl)piperazin-1-yl]-2,2-diphenylethan-1-one (9)

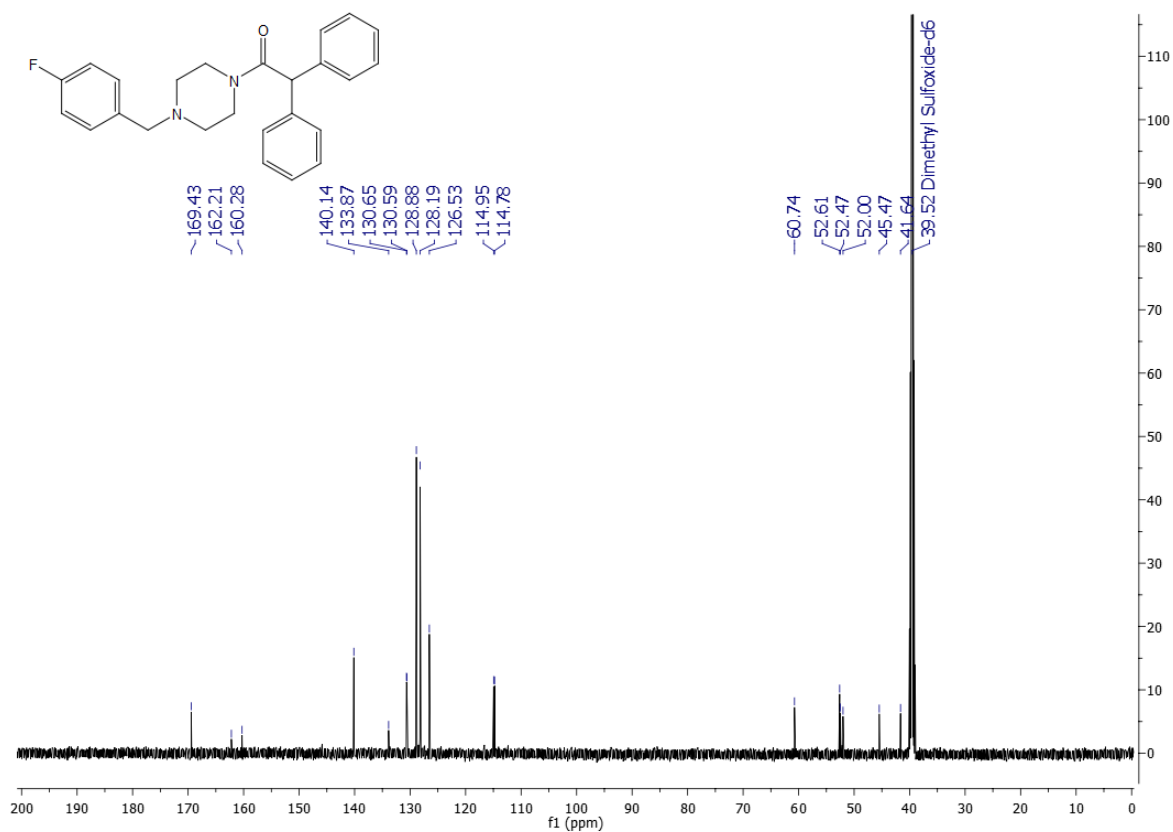

**Figure S7:**  $^{13}\text{C-NMR}$  (DMSO- $d_6$ ) spectrum of 1-[4-(4-Fluorobenzyl)piperazin-1-yl]-2,2-diphenylethan-1-one (9)

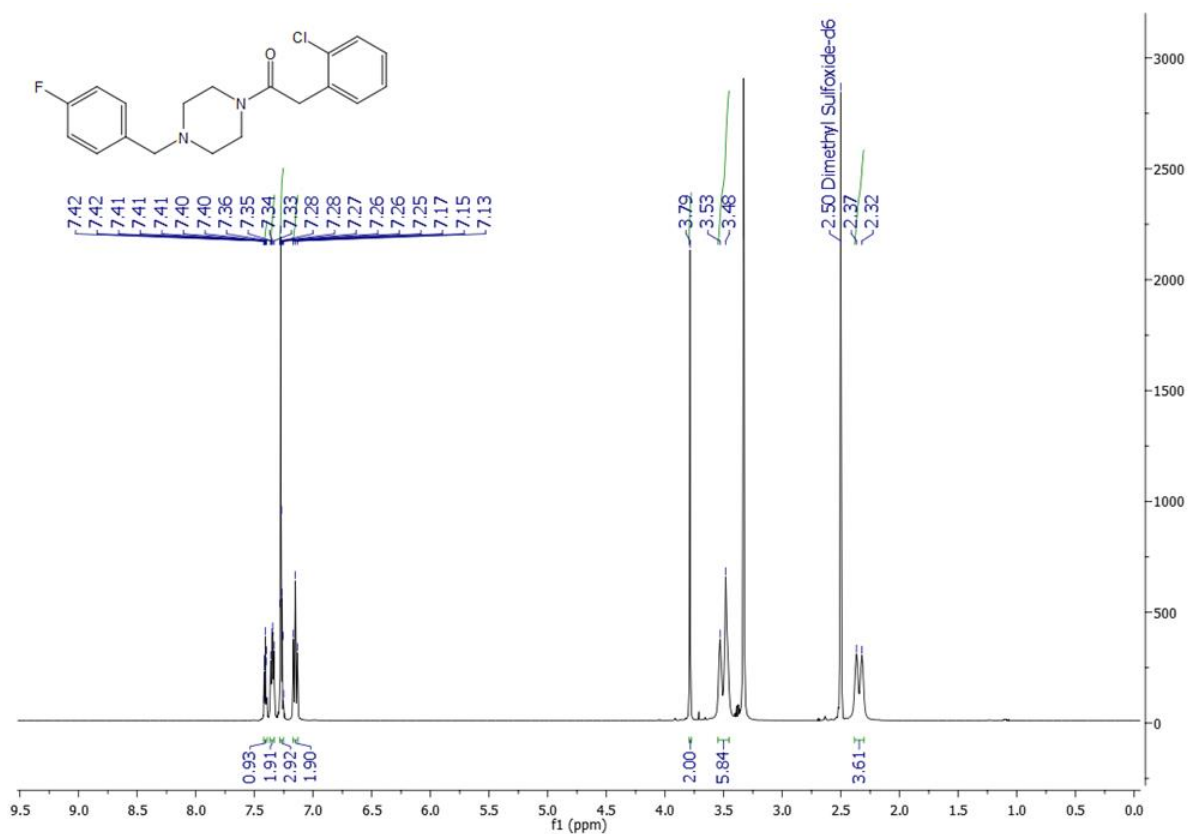

**Figure S8:** <sup>1</sup>H-NMR (DMSO-d<sub>6</sub>) spectrum of 1-[4-(4-Fluorobenzyl)piperazin-1-yl]-2-(2-chlorophenyl)ethan-1-one (10)

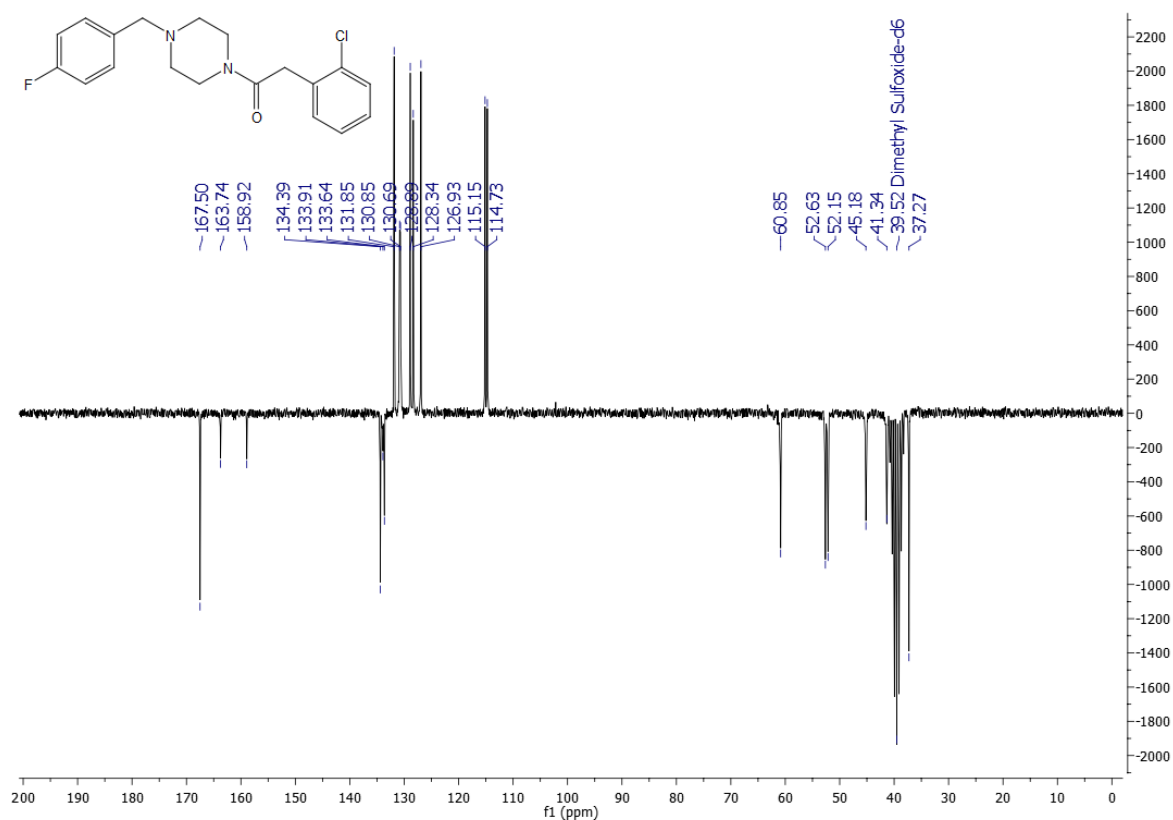

**Figure S9:** <sup>13</sup>C-NMR (DMSO-d<sub>6</sub>) spectrum of 1-[4-(4-Fluorobenzyl)piperazin-1-yl]-2-(2-chlorophenyl)ethan-1-one (10)

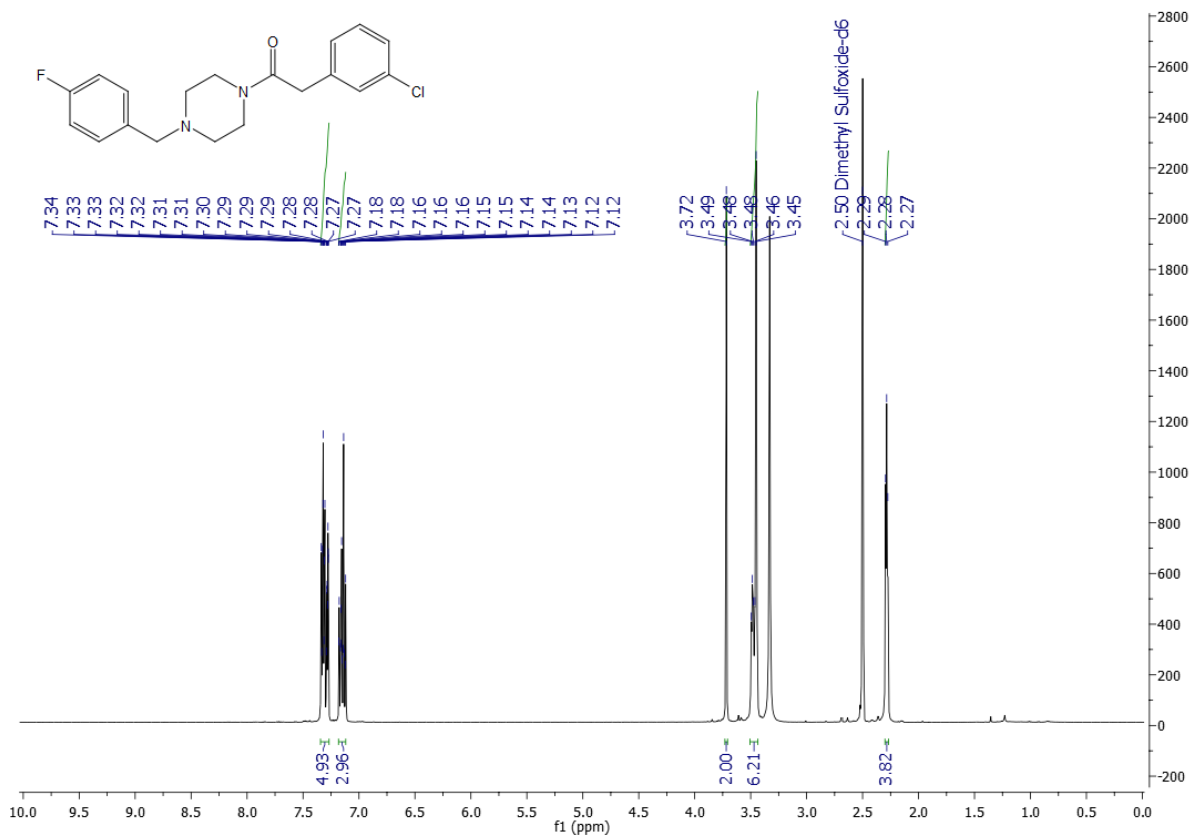

**Figure S10:** <sup>1</sup>H-NMR (DMSO-d<sub>6</sub>) spectrum of 1-[4-(4-Fluorobenzyl)piperazin-1-yl]-2-(3-chlorophenyl)ethan-1-one (**11**)

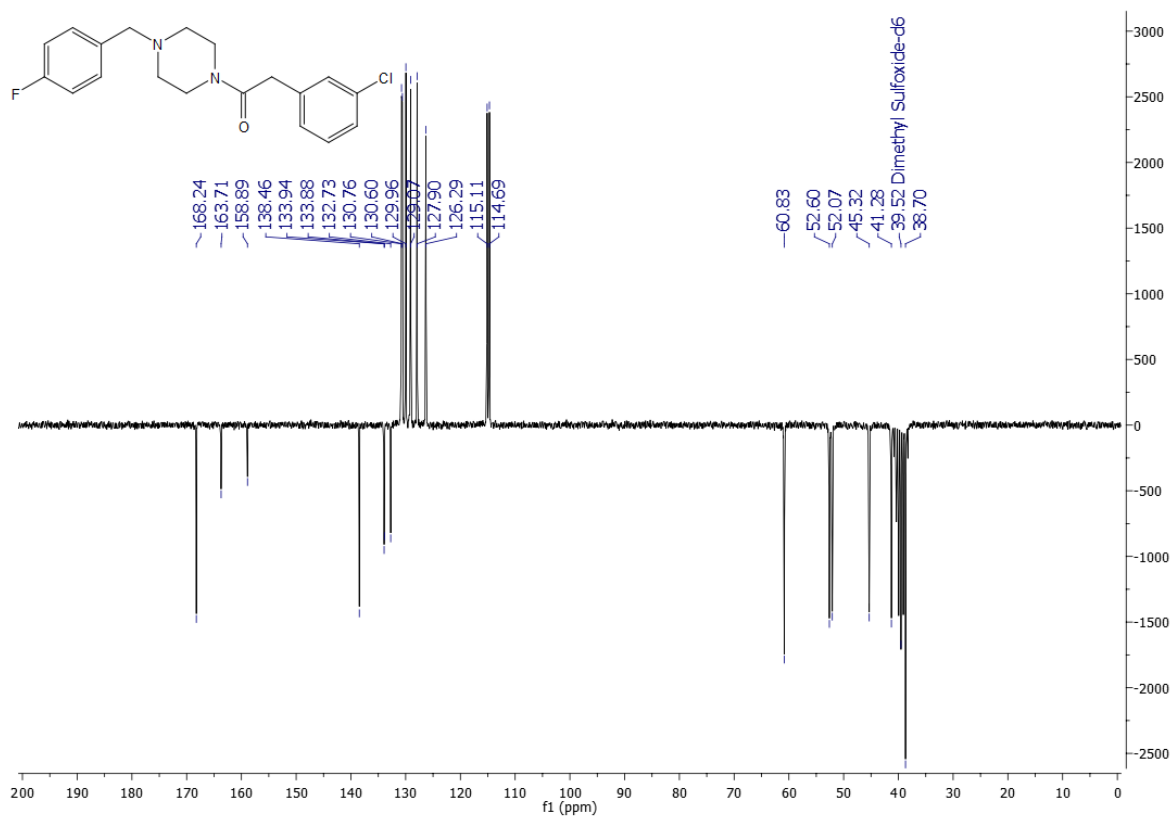

**Figure S11:** <sup>13</sup>C-NMR (DMSO-d<sub>6</sub>) spectrum of 1-[4-(4-Fluorobenzyl)piperazin-1-yl]-2-(3-chlorophenyl)ethan-1-one (**11**)



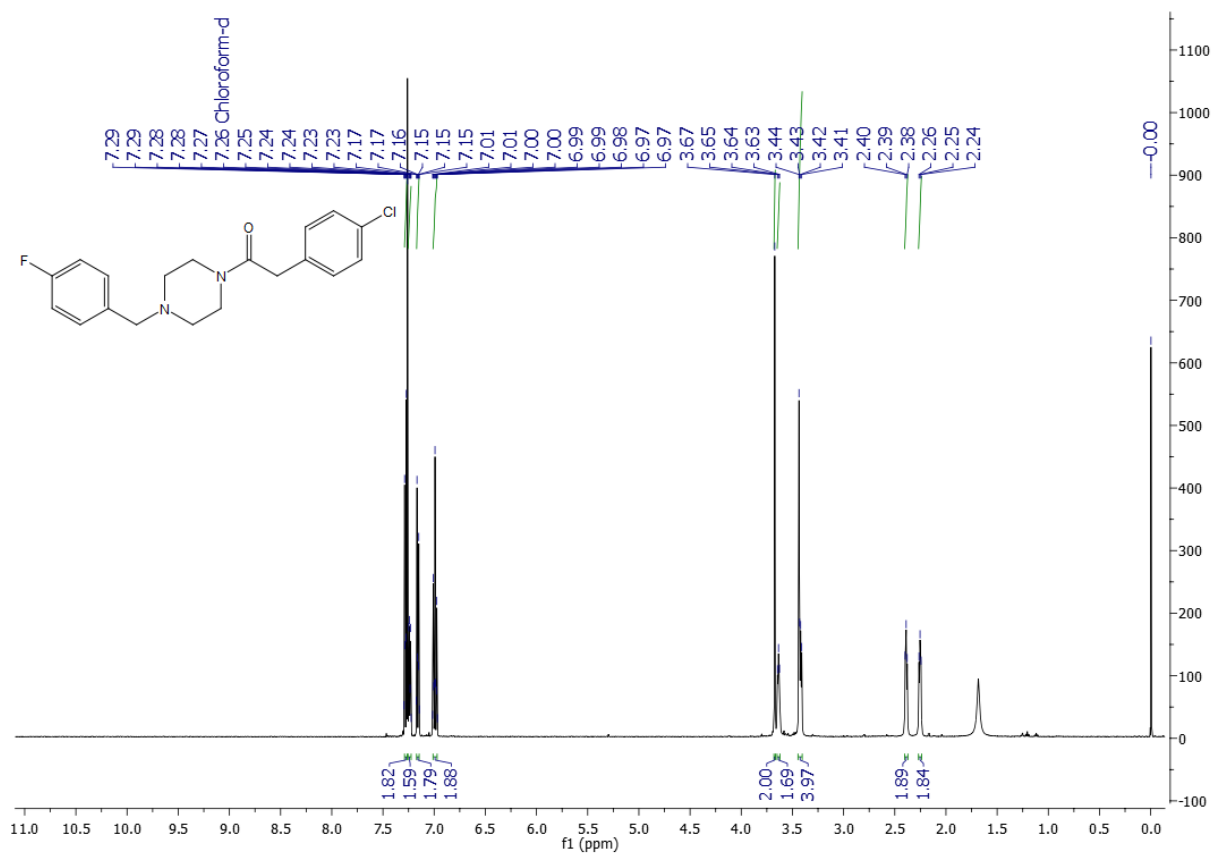

**Figure S12:** <sup>1</sup>H-NMR (CDCl<sub>3</sub>) spectrum of 1-[4-(4-Fluorobenzyl)piperazin-1-yl]-2-(4-chlorophenyl)ethan-1-one (12)

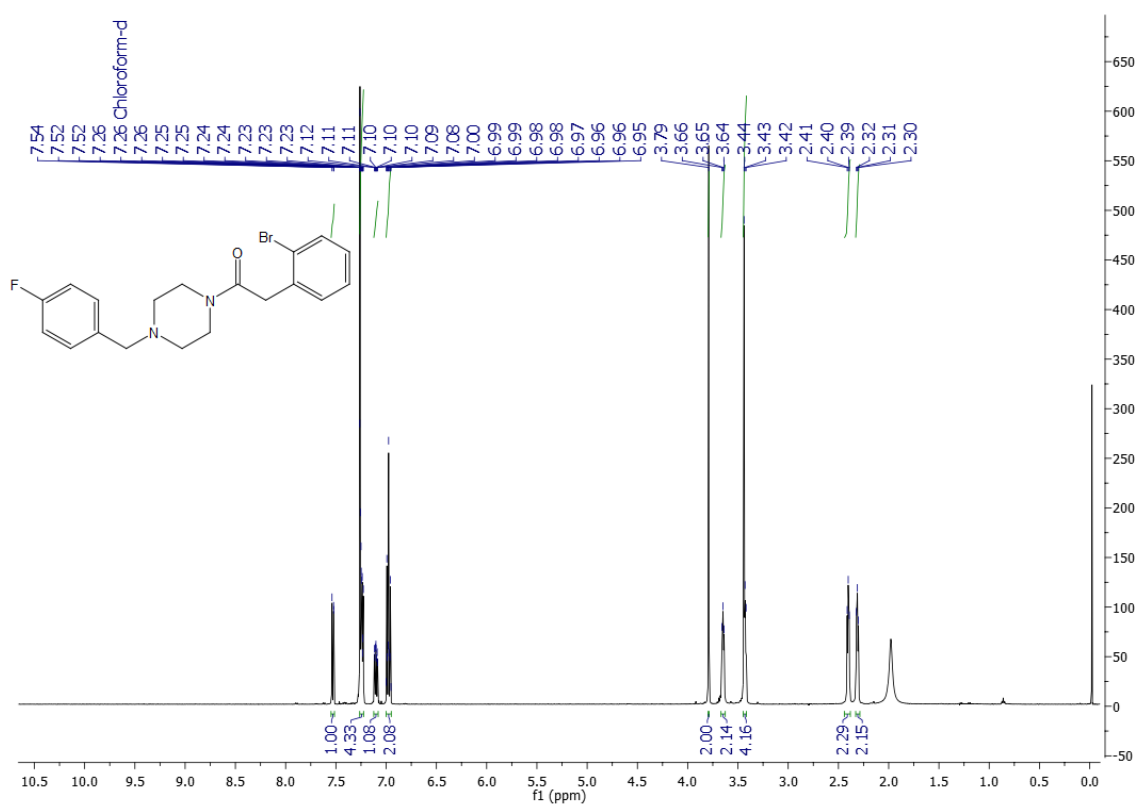

**Figure S13:** <sup>1</sup>H-NMR (CDCl<sub>3</sub>) spectrum of 1-[4-(4-Fluorobenzyl)piperazin-1-yl]-2-(2-bromophenyl)ethan-1-one (13)

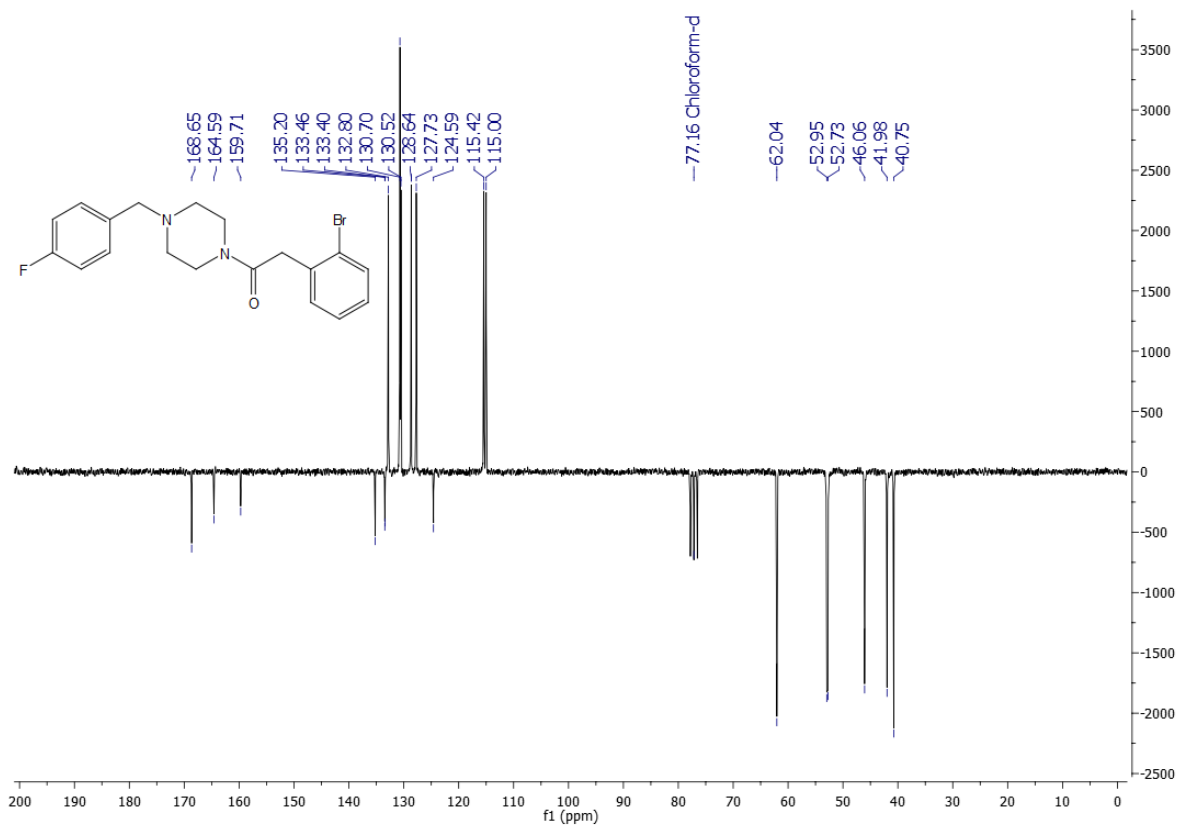

**Figure S14:**  $^{13}\text{C}$ -NMR ( $\text{CDCl}_3$ ) spectrum of 1-[4-(4-Fluorobenzyl)piperazin-1-yl]-2-(2-bromophenyl)ethan-1-one (13)

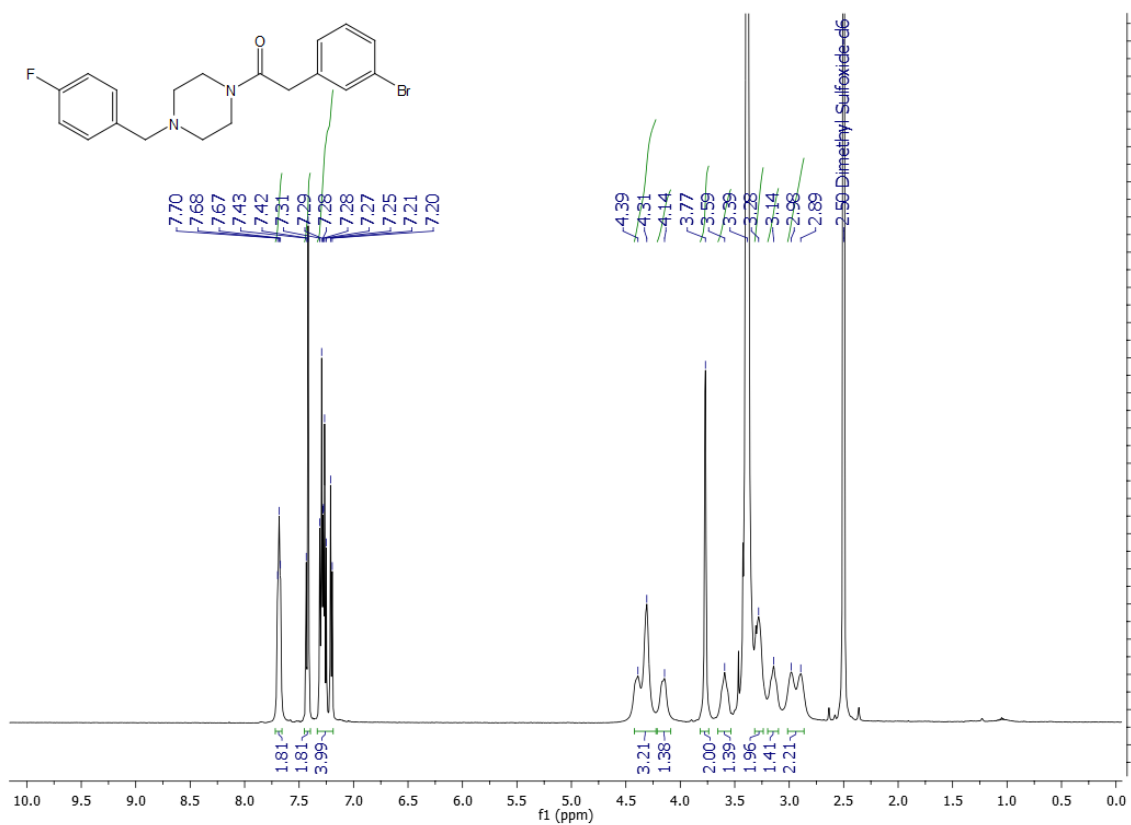

**Figure S15:**  $^1\text{H}$ -NMR ( $\text{DMSO-d}_6$ ) spectrum of 1-[4-(4-Fluorobenzyl)piperazin-1-yl]-2-(3-bromophenyl)ethan-1-one (14)

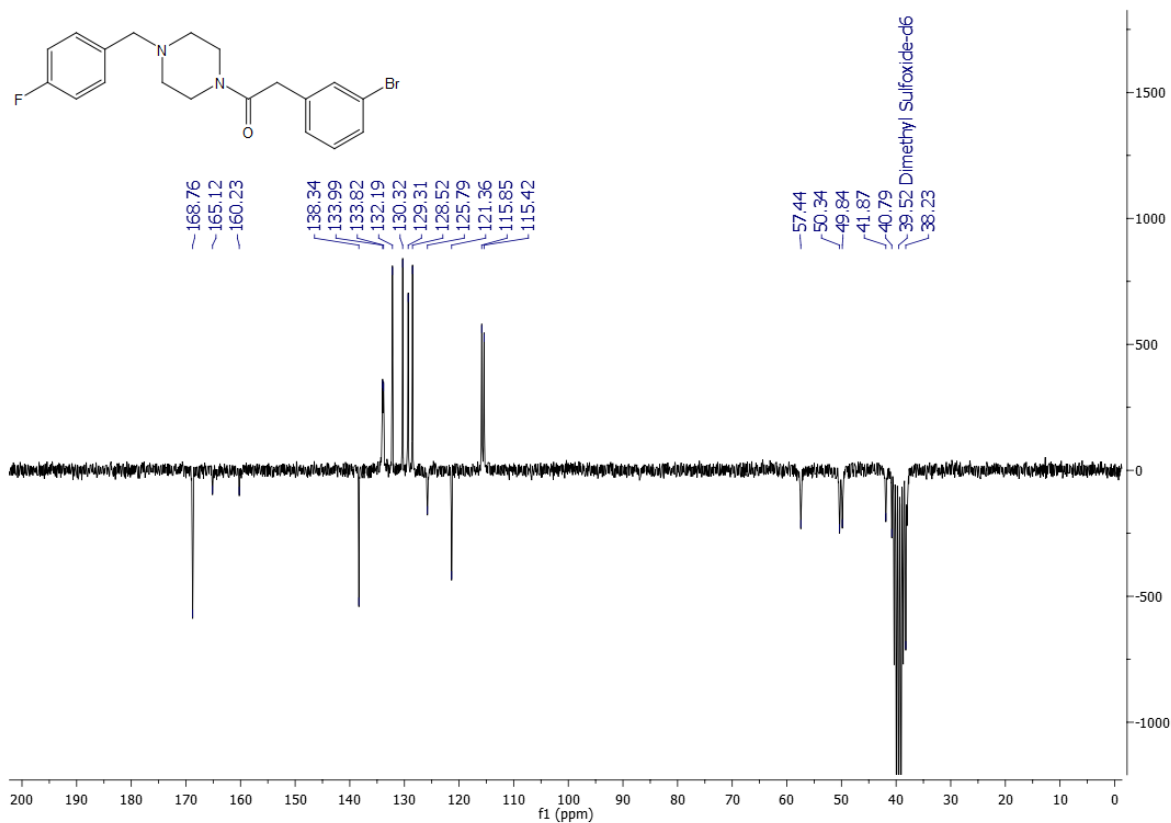

**Figure S16:** <sup>13</sup>C-NMR (DMSO-d<sub>6</sub>) spectrum of 1-[4-(4-Fluorobenzyl)piperazin-1-yl]-2-(3-bromophenyl)ethan-1-one (14)

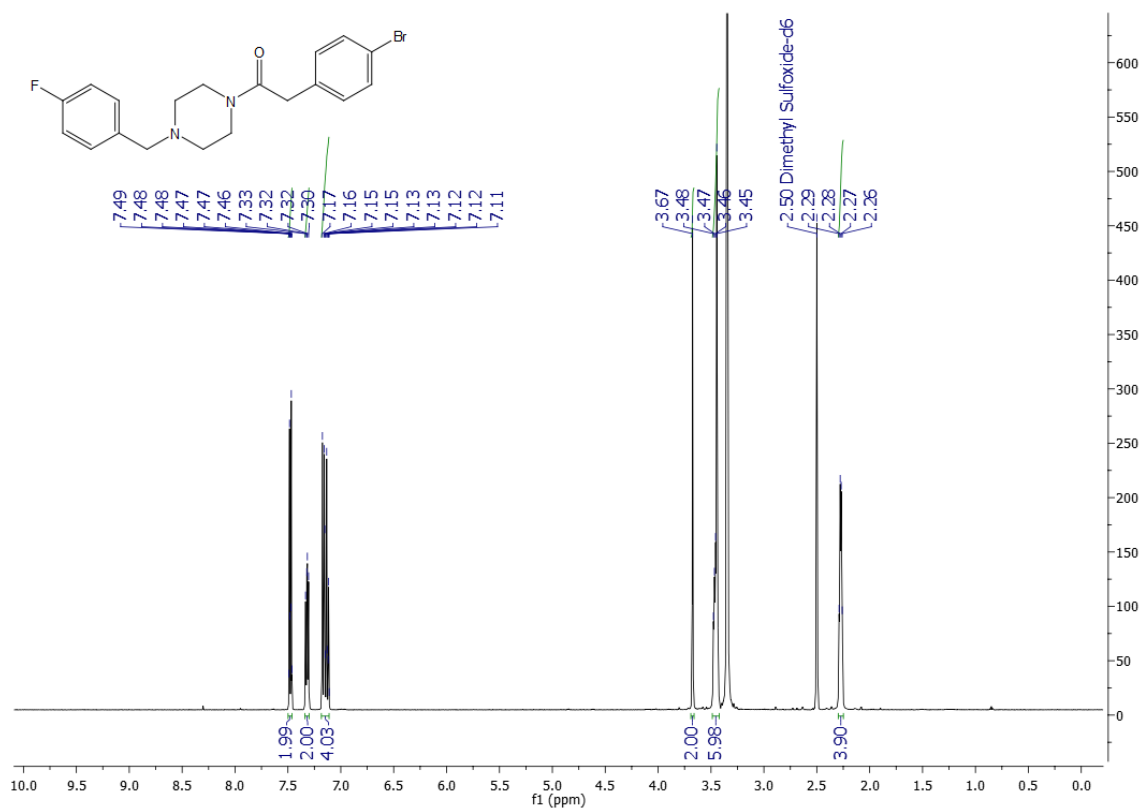

**Figure S17:** <sup>1</sup>H-NMR (DMSO-d<sub>6</sub>) spectrum of 1-[4-(4-Fluorobenzyl)piperazin-1-yl]-2-(4-bromophenyl)ethan-1-one (15)

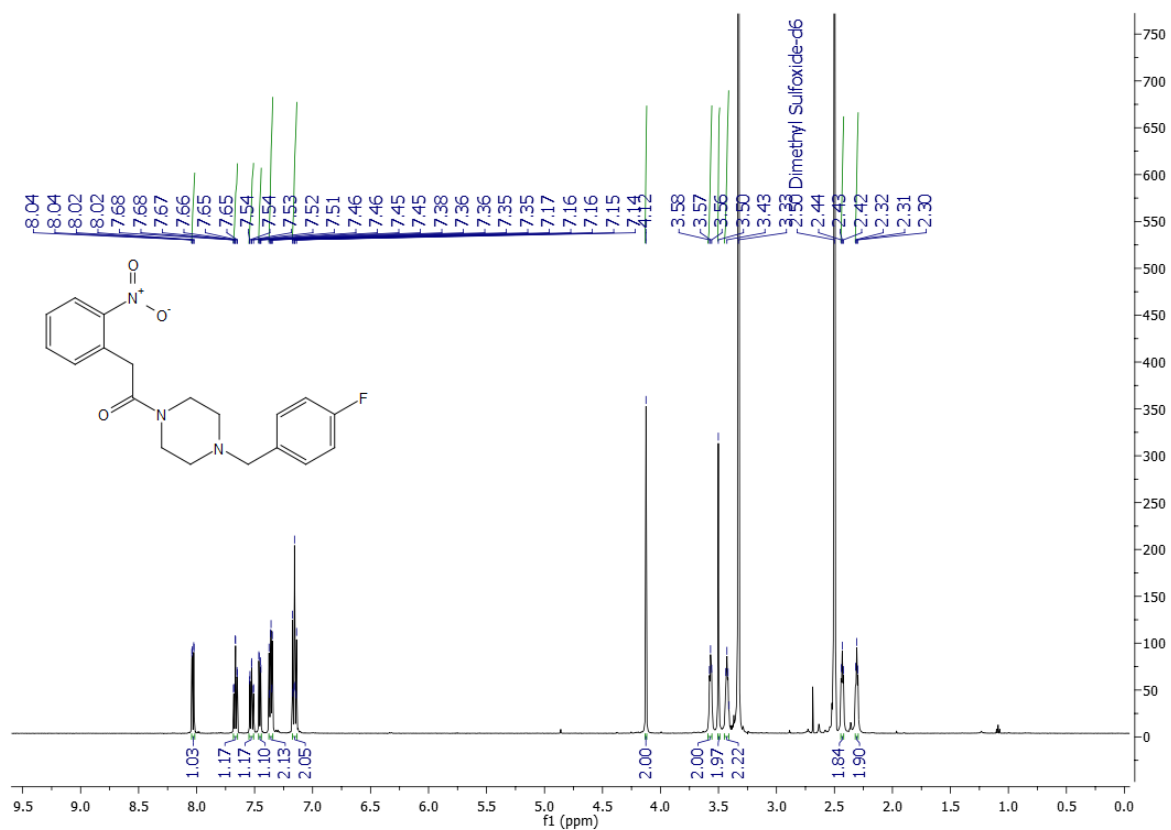

**Figure S18:** <sup>1</sup>H-NMR (DMSO-d<sub>6</sub>) spectrum of 1-[4-(4-Fluorobenzyl)piperazin-1-yl]-2-(2-nitrophenyl)ethan-1-one (16)

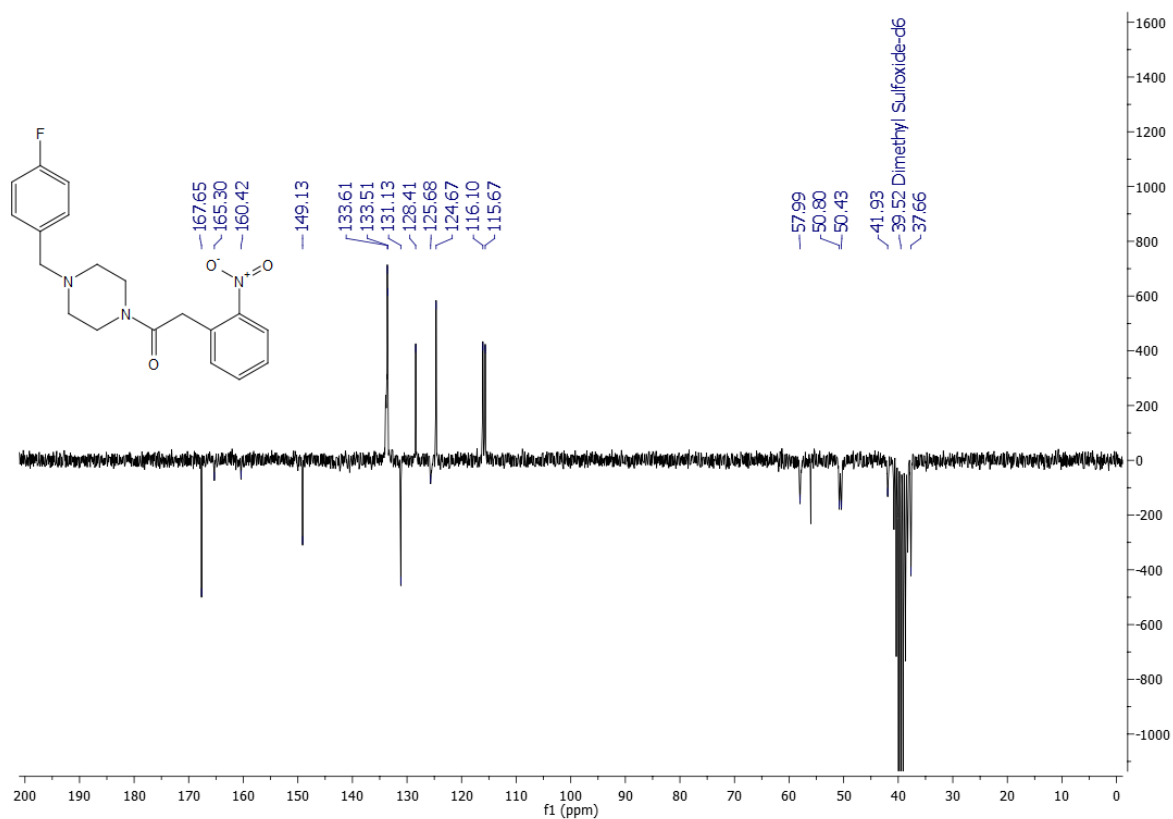

**Figure S19:** <sup>13</sup>C-NMR (DMSO-d<sub>6</sub>) spectrum of 1-[4-(4-Fluorobenzyl)piperazin-1-yl]-2-(2-nitrophenyl)ethan-1-one (16)

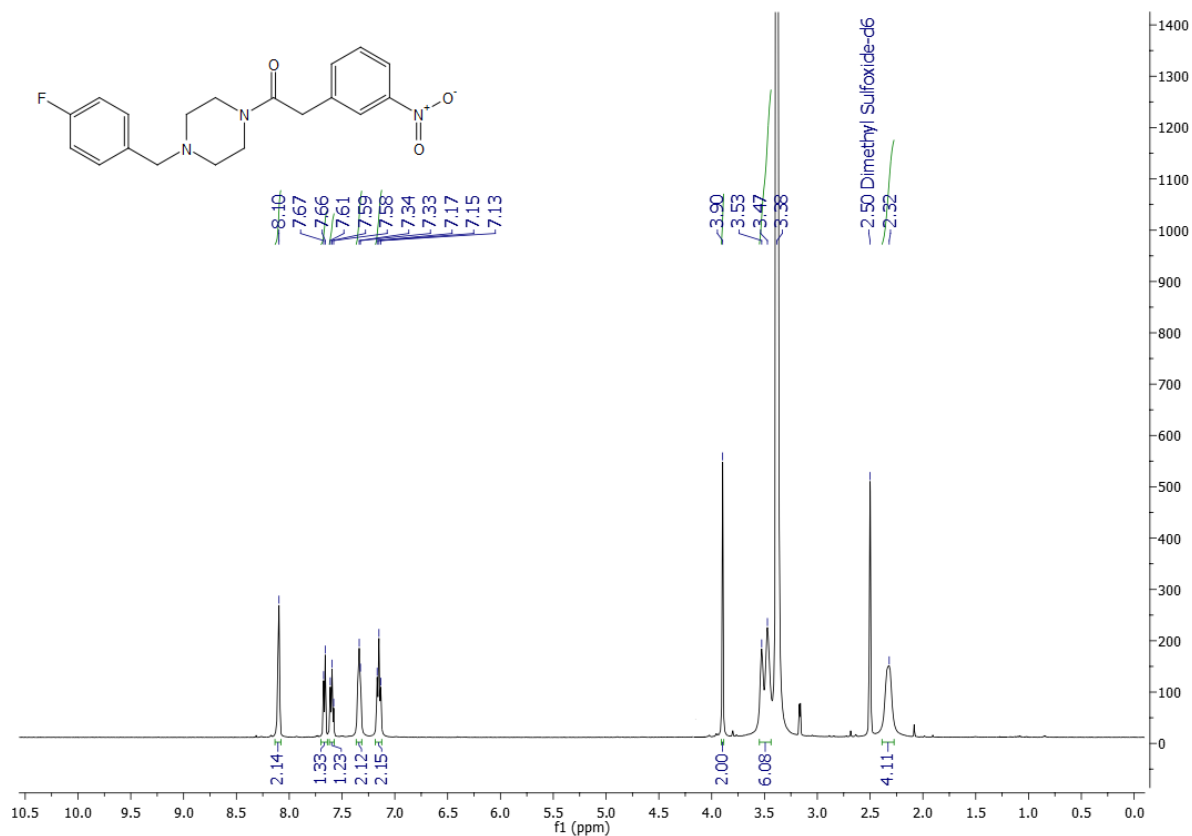

**Figure S20:** <sup>1</sup>H-NMR (DMSO-d<sub>6</sub>) spectrum of 1-[4-(4-Fluorobenzyl)piperazin-1-yl]-2-(3-nitrophenyl)ethan-1-one (17)

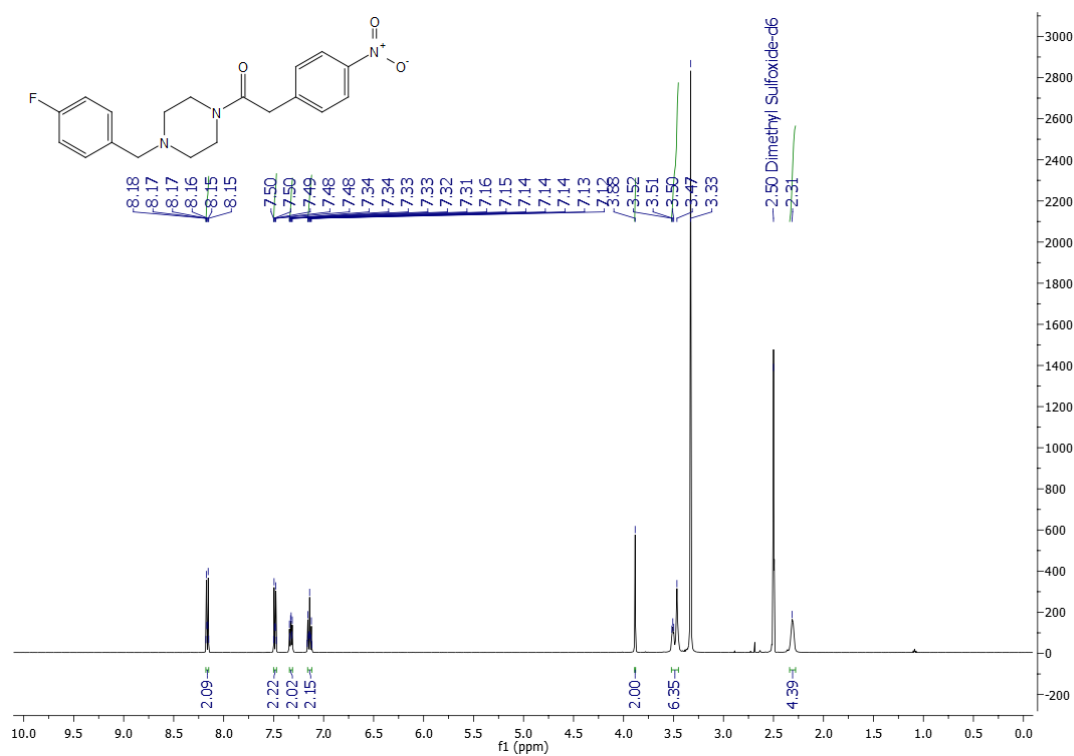

**Figure S21:** <sup>1</sup>H-NMR (DMSO-d<sub>6</sub>) spectrum of 1-[4-(4-Fluorobenzyl)piperazin-1-yl]-2-(4-nitrophenyl)ethan-1-one (18)

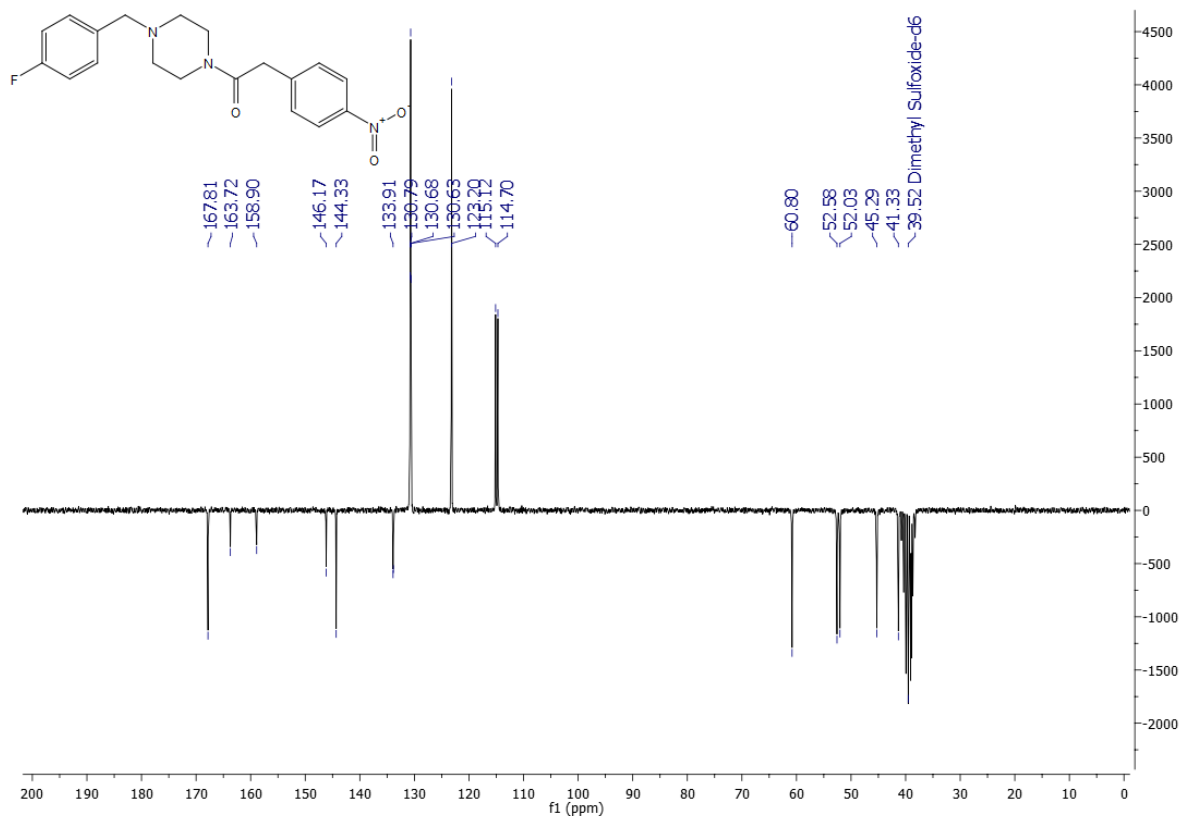

**Figure S22:**  $^{13}\text{C}$ -NMR (DMSO- $d_6$ ) spectrum of 1-[4-(4-Fluorobenzyl)piperazin-1-yl]-2-(4-nitrophenyl)ethan-1-one (**18**)

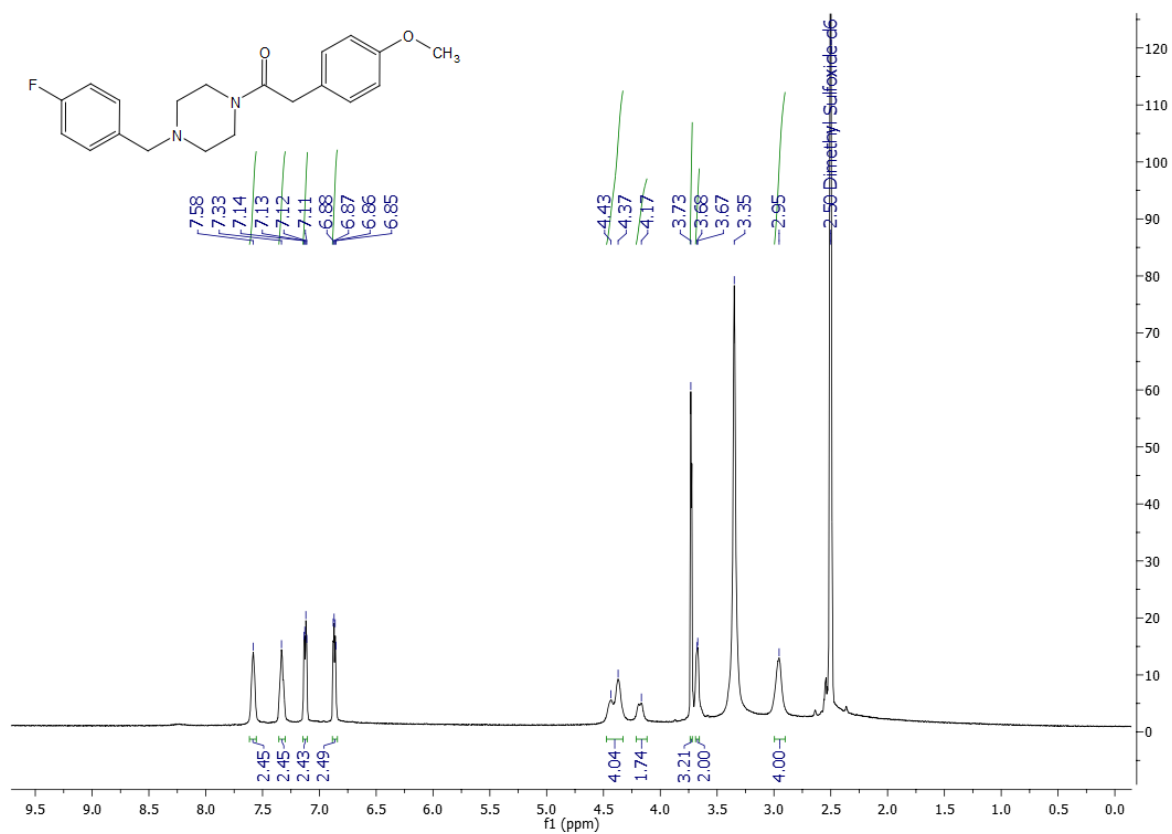

**Figure S23:**  $^1\text{H}$ -NMR (DMSO- $d_6$ ) spectrum of 1-[4-(4-Fluorobenzyl)piperazin-1-yl]-2-(4-methoxyphenyl)ethan-1-one (**19**)

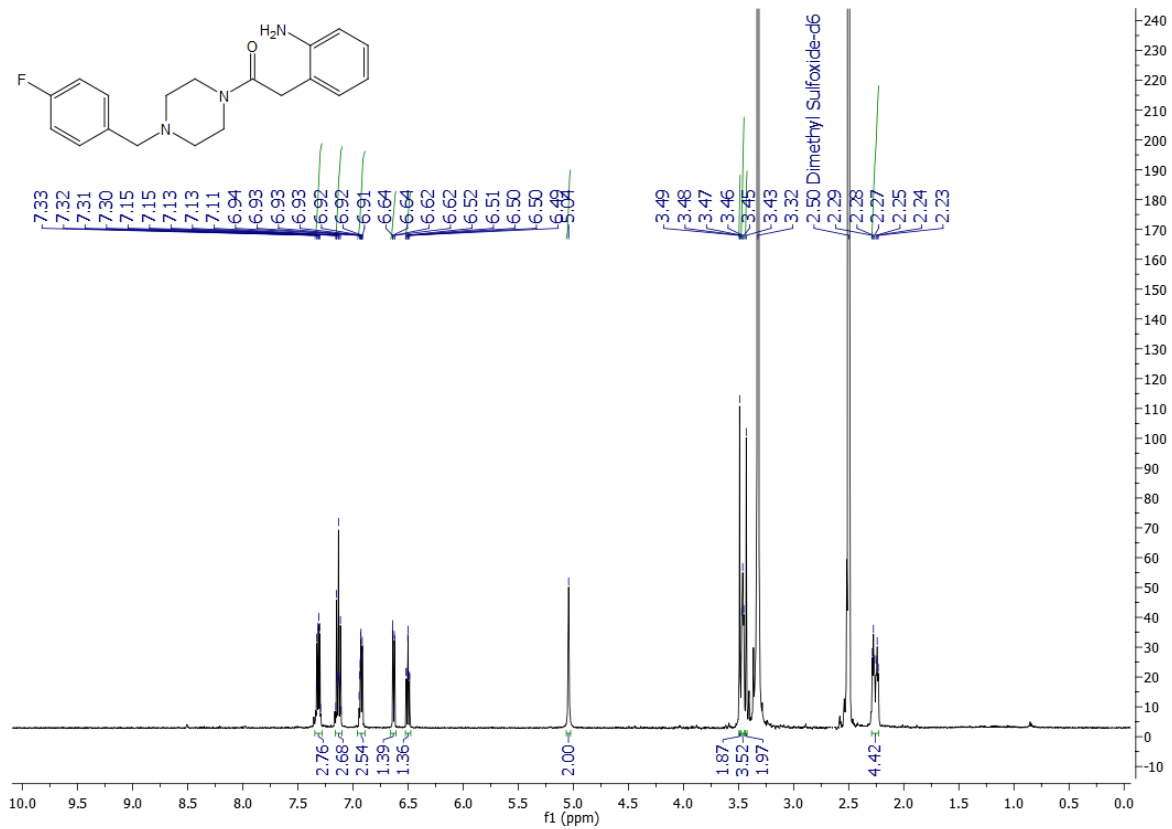

**Figure S24:** <sup>1</sup>H-NMR (DMSO-d<sub>6</sub>) spectrum of 1-[4-(4-Fluorobenzyl)piperazin-1-yl]-2-(2-aminophenyl)ethan-1-one (20)

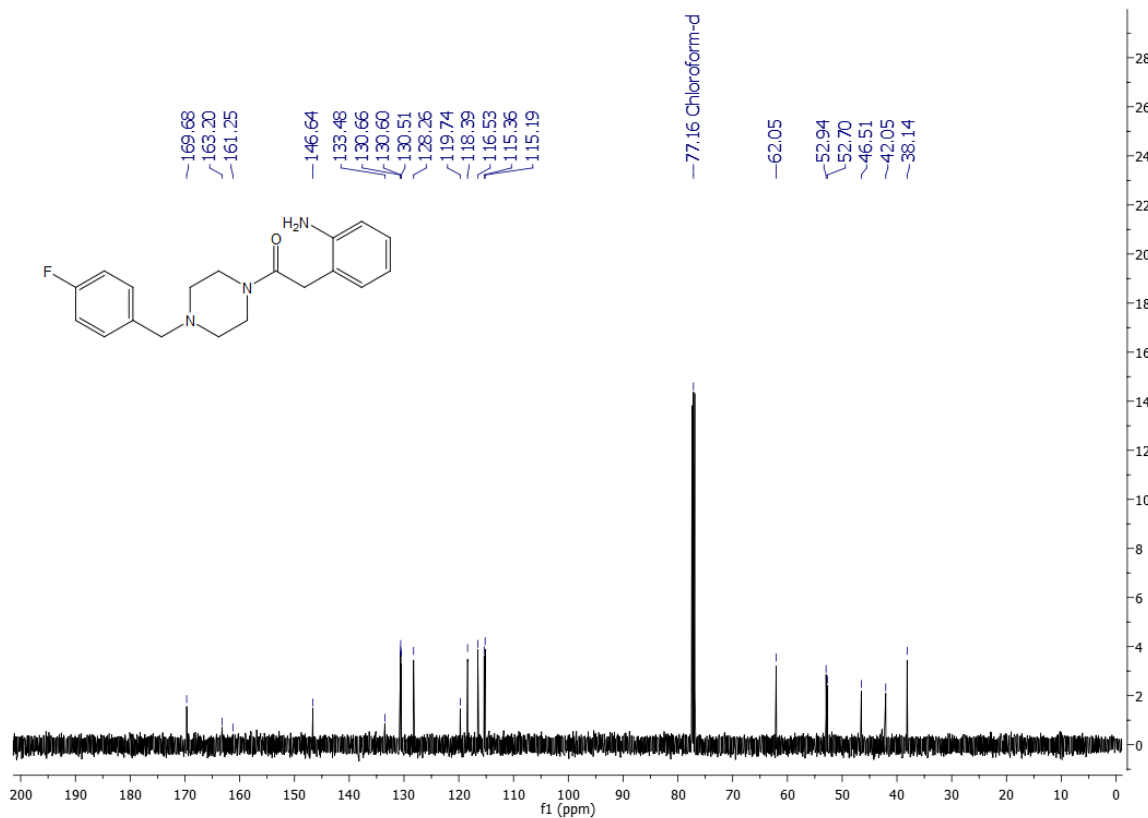

**Figure S25:** <sup>13</sup>C-NMR (CDCl<sub>3</sub>) spectrum of 1-[4-(4-Fluorobenzyl)piperazin-1-yl]-2-(2-aminophenyl)ethan-1-one (20)

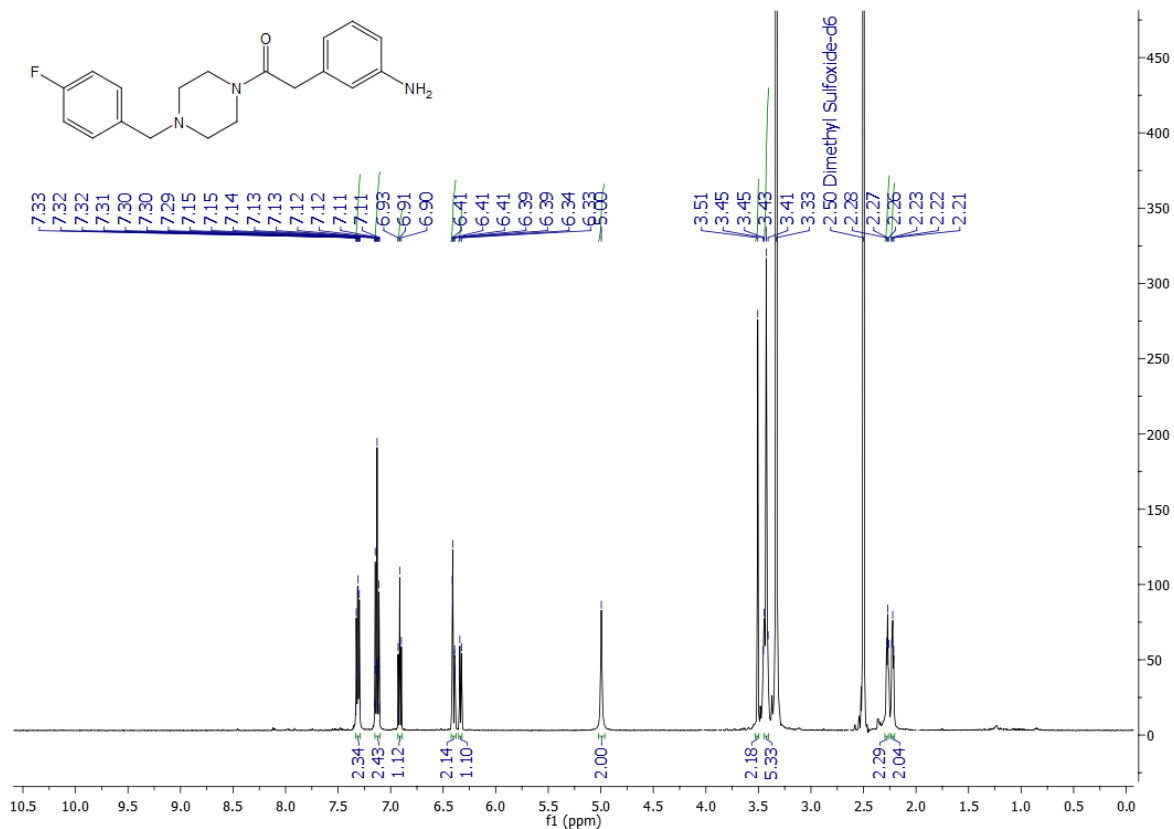

**Figure S26:** <sup>1</sup>H-NMR (DMSO-d<sub>6</sub>) spectrum of 1-[4-(4-Fluorobenzyl)piperazin-1-yl]-2-(3-aminophenyl)ethan-1-one (**21**)

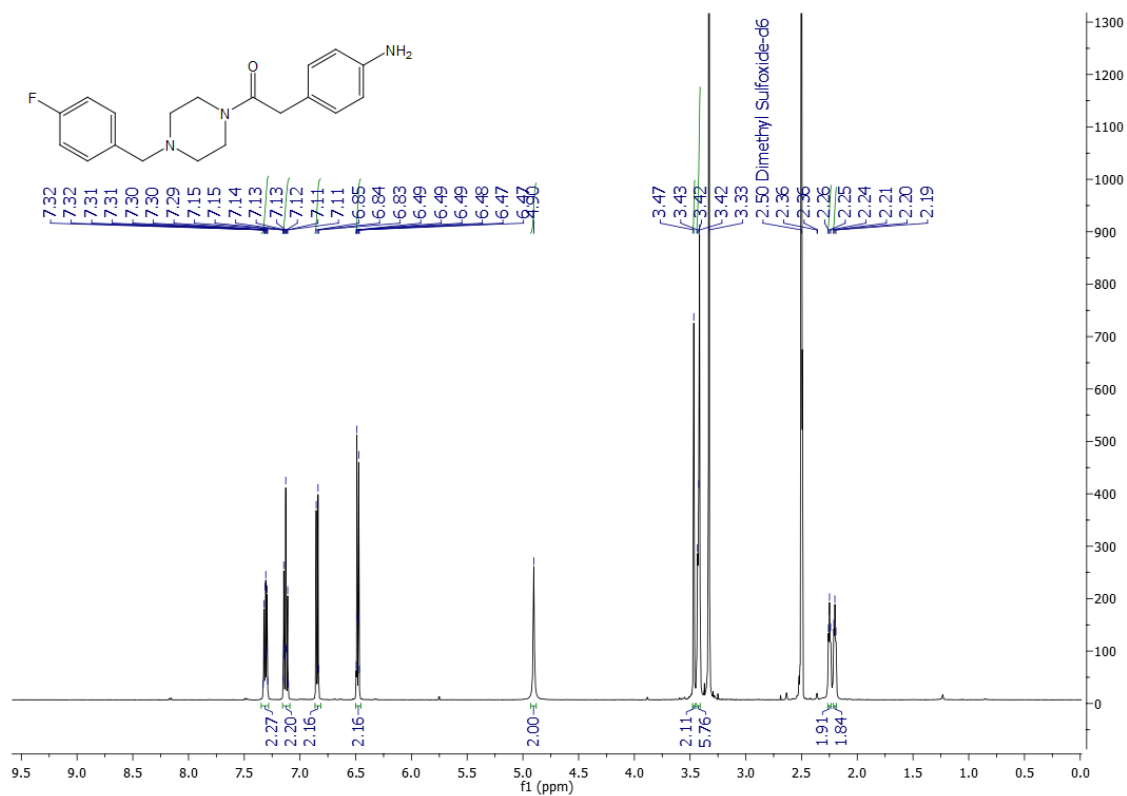

**Figure S27:** <sup>1</sup>H-NMR (DMSO-d<sub>6</sub>) spectrum of 1-[4-(4-Fluorobenzyl)piperazin-1-yl]-2-(4-aminophenyl)ethan-1-one (**22**)



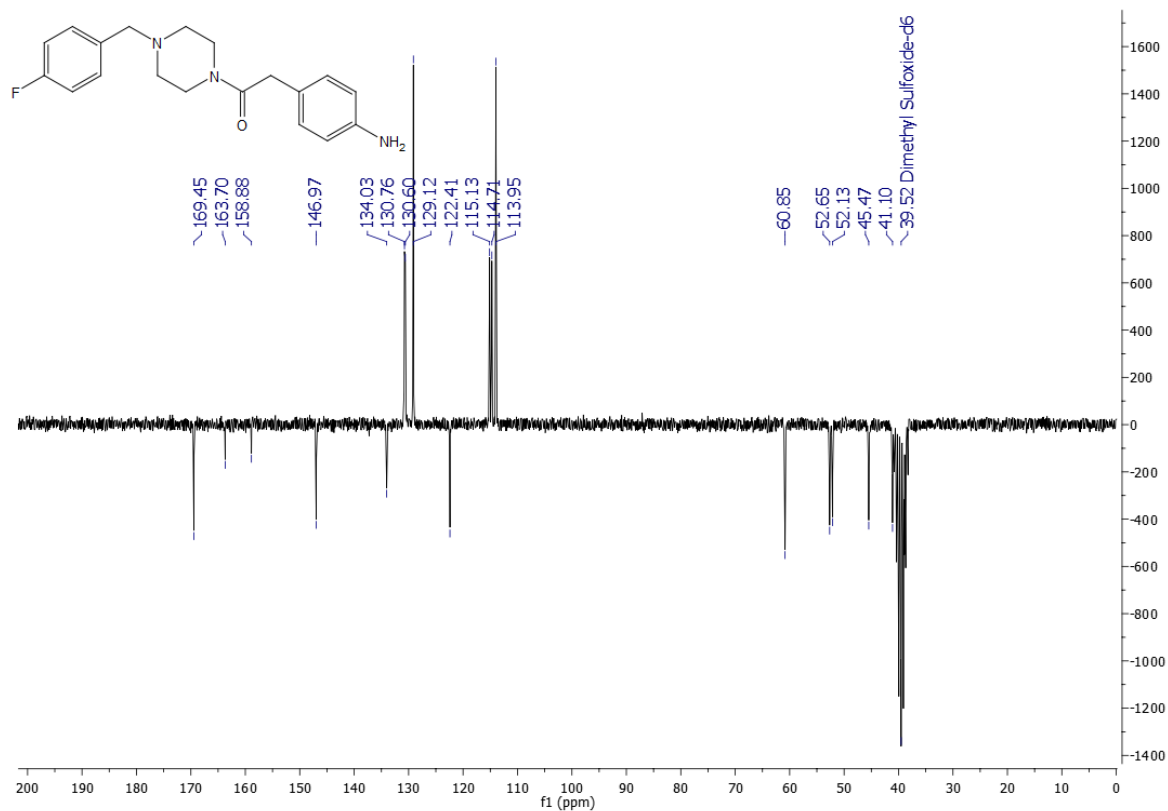

**Figure S28:**  $^{13}\text{C}$ -NMR (DMSO- $d_6$ ) spectrum of 1-[4-(4-Fluorobenzyl)piperazin-1-yl]-2-(4-aminophenyl)ethan-1-one (**22**)

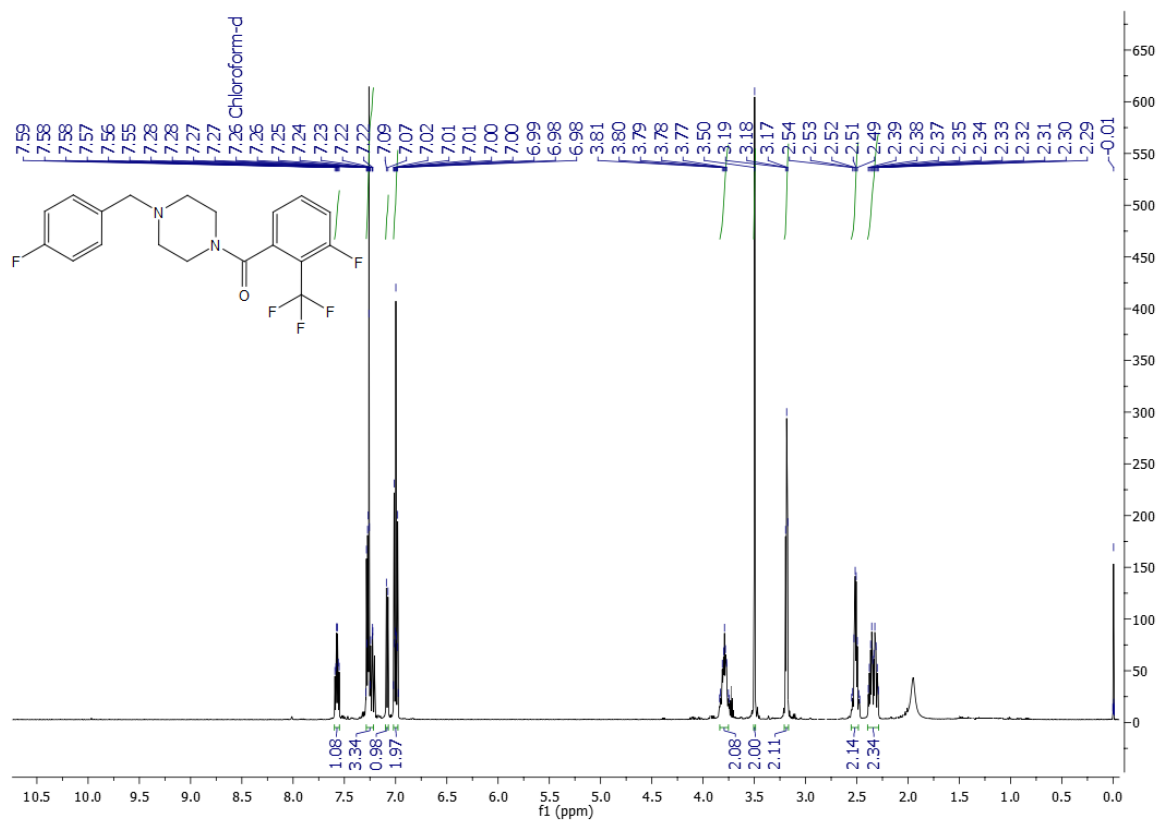

**Figure S29:**  $^1\text{H}$ -NMR ( $\text{CDCl}_3$ ) spectrum of [4-(4-Fluorobenzyl)piperazin-1-yl]-[3-fluoro-2-(trifluoromethyl)phenyl]methanone (**23**)

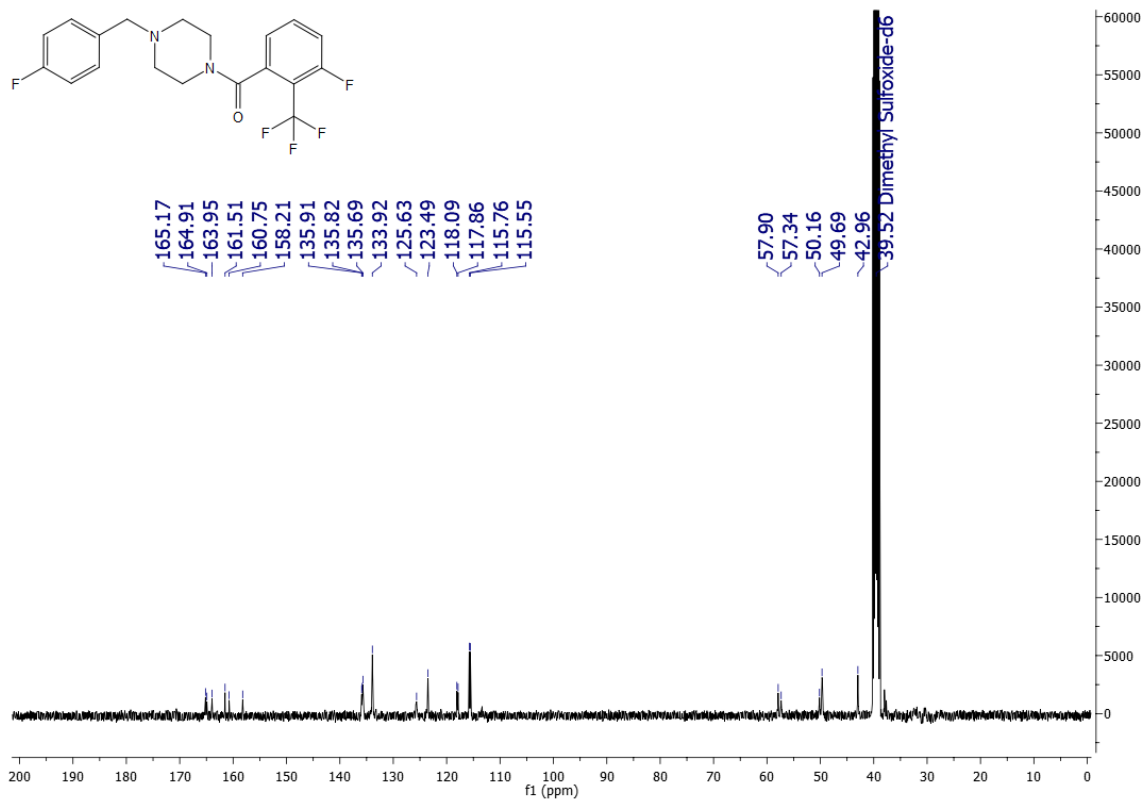

**Figure S30:**  $^{13}\text{C}$ -NMR (DMSO- $d_6$ ) spectrum of [4-(4-Fluorobenzyl)piperazin-1-yl]-[3-fluoro-2-(trifluoromethyl)phenyl]methanone (**23**)

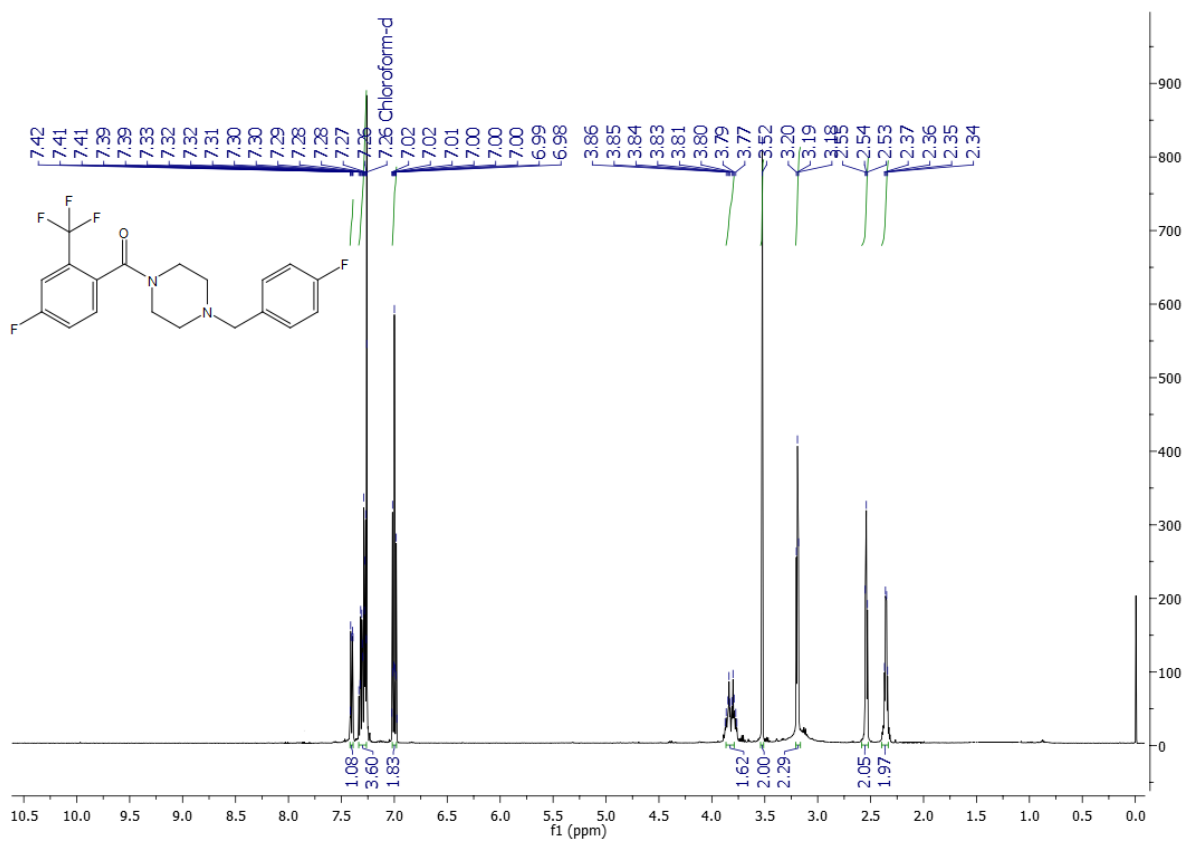

**Figure S31:**  $^1\text{H}$ -NMR ( $\text{CDCl}_3$ ) spectrum of 1-[4-(4-Fluorobenzyl)piperazin-1-yl]-[4-fluoro-2-(trifluoromethyl)phenyl]methanone (**24**)

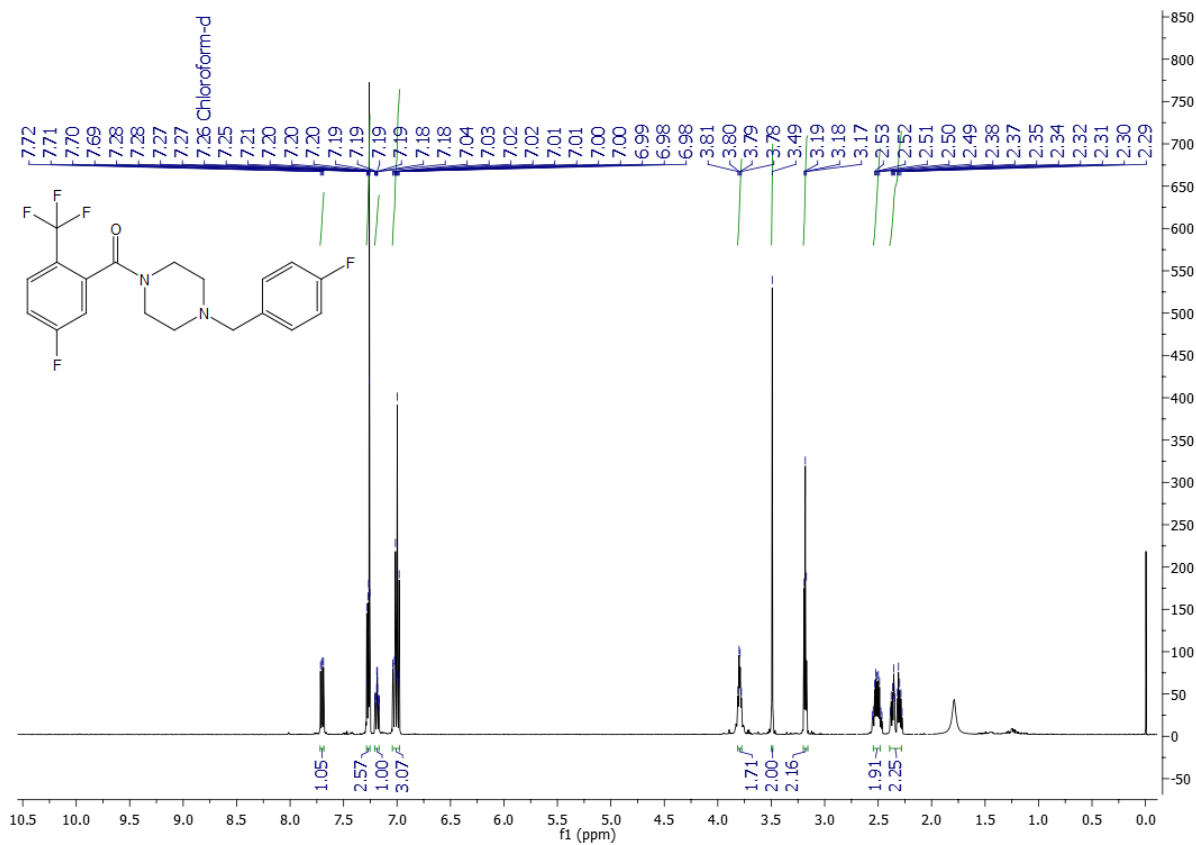

**Figure S32:** <sup>1</sup>H-NMR (CDCl<sub>3</sub>) spectrum of 1-[4-(4-Fluorobenzyl)piperazin-1-yl]-[5-fluoro-2-(trifluoromethyl)phenyl]methanone (25)

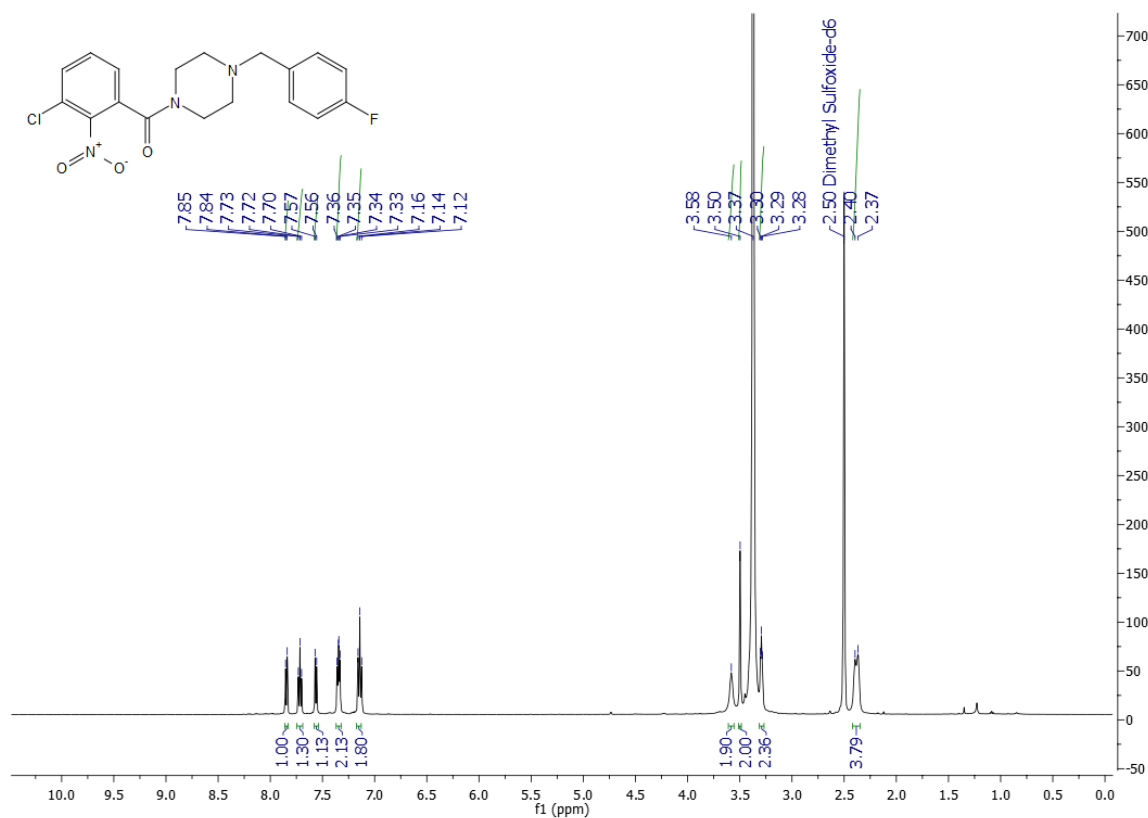

**Figure S33:** <sup>1</sup>H-NMR (DMSO-d<sub>6</sub>) spectrum of 1-[4-(4-Fluorobenzyl)piperazin-1-yl]-[3-chloro-2-nitrophenyl]methanone (26)

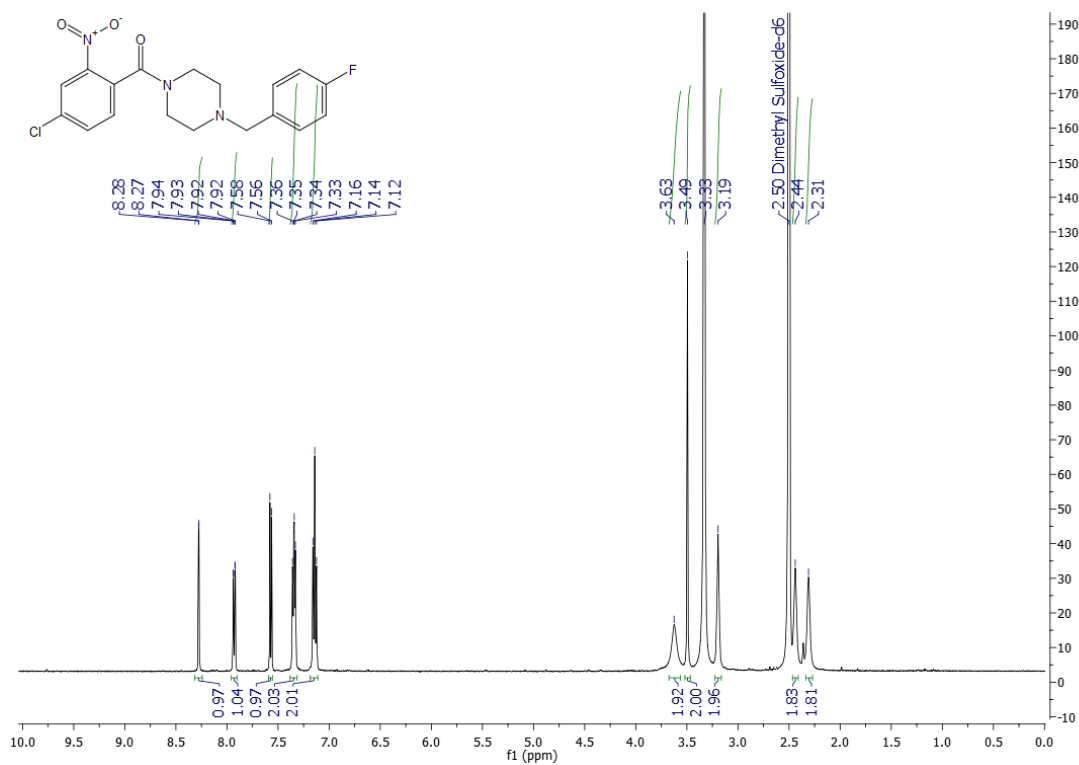

**Figure S34:**  $^1\text{H-NMR}$  (DMSO- $d_6$ ) spectrum of [4-(4-Fluorobenzyl)piperazin-1-yl]-(4-chloro-2-nitrophenyl)methanone (27)

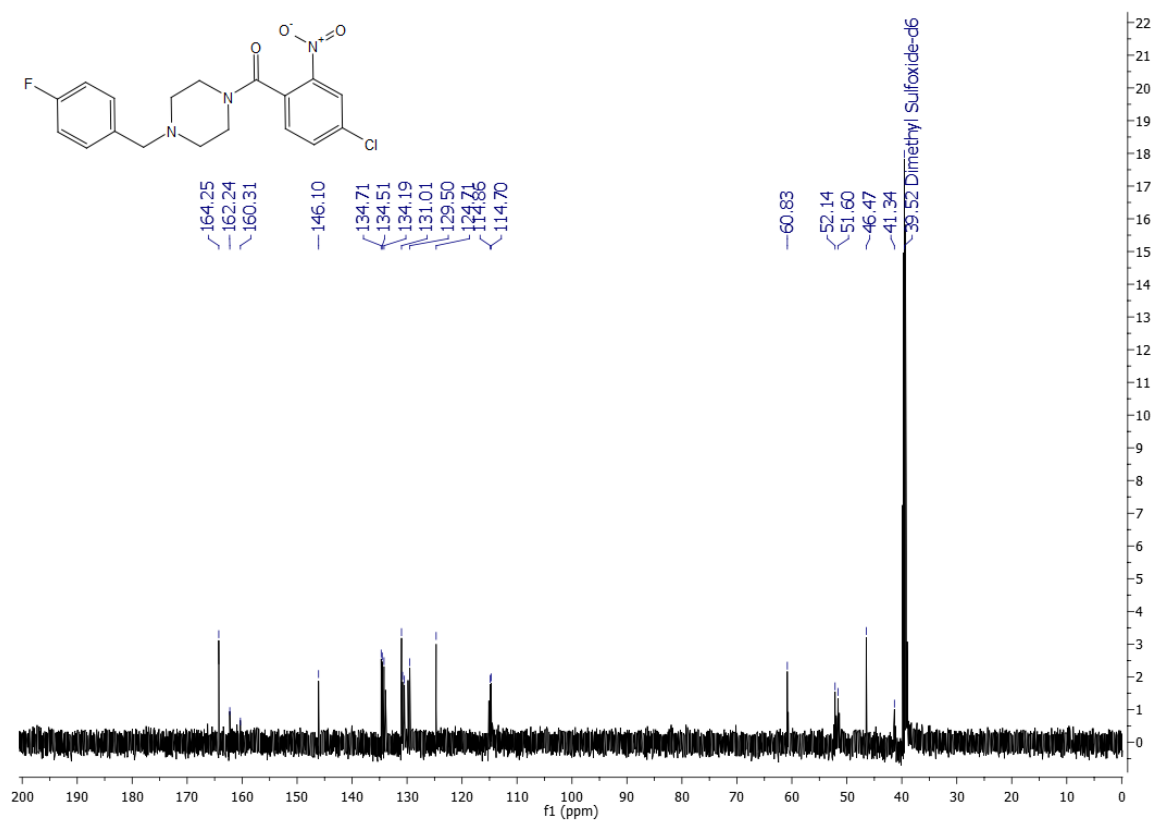

**Figure S35:**  $^{13}\text{C-NMR}$  (DMSO- $d_6$ ) spectrum of [4-(4-Fluorobenzyl)piperazin-1-yl]-(4-chloro-2-nitrophenyl)methanone (27)

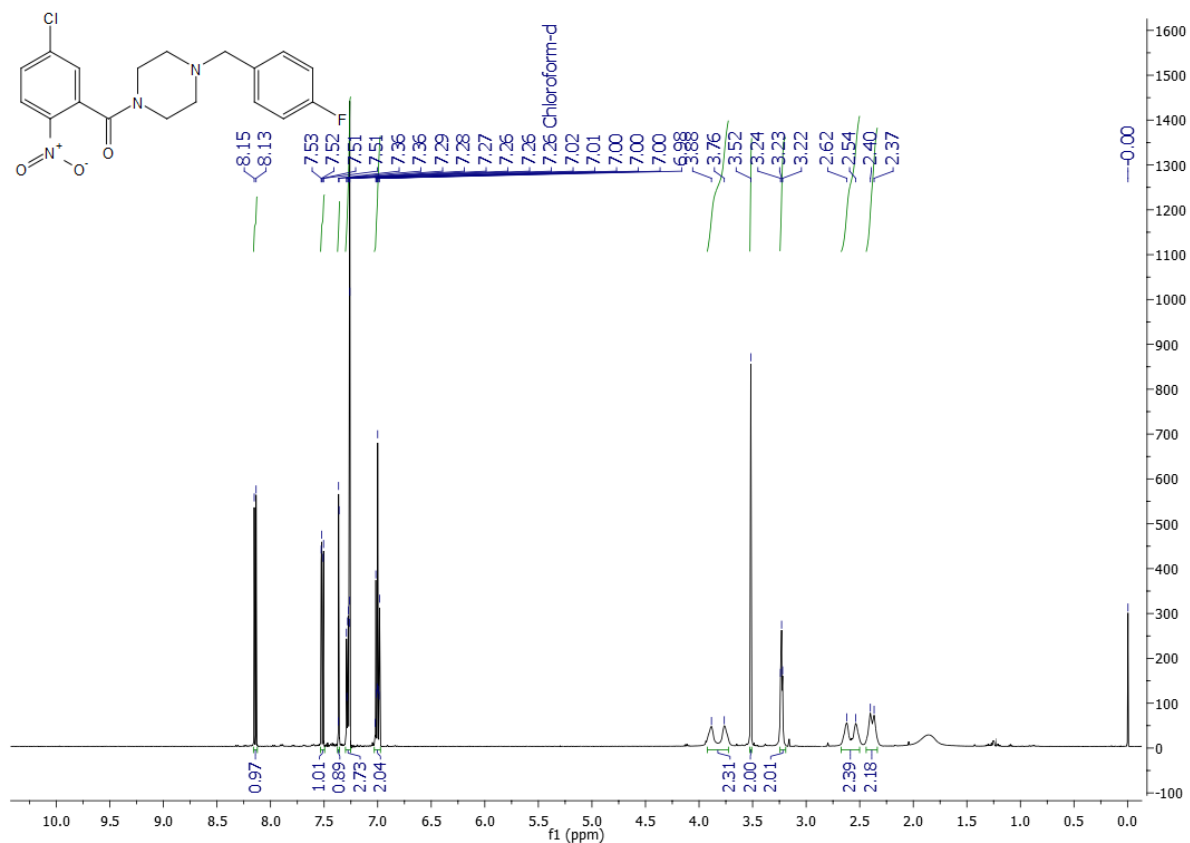

**Figure S36:** <sup>1</sup>H-NMR (CDCl<sub>3</sub>) spectrum of 1-[4-(4-Fluorobenzyl)piperazin-1-yl]-(5-chloro-2-nitrophenyl)methanone (28)

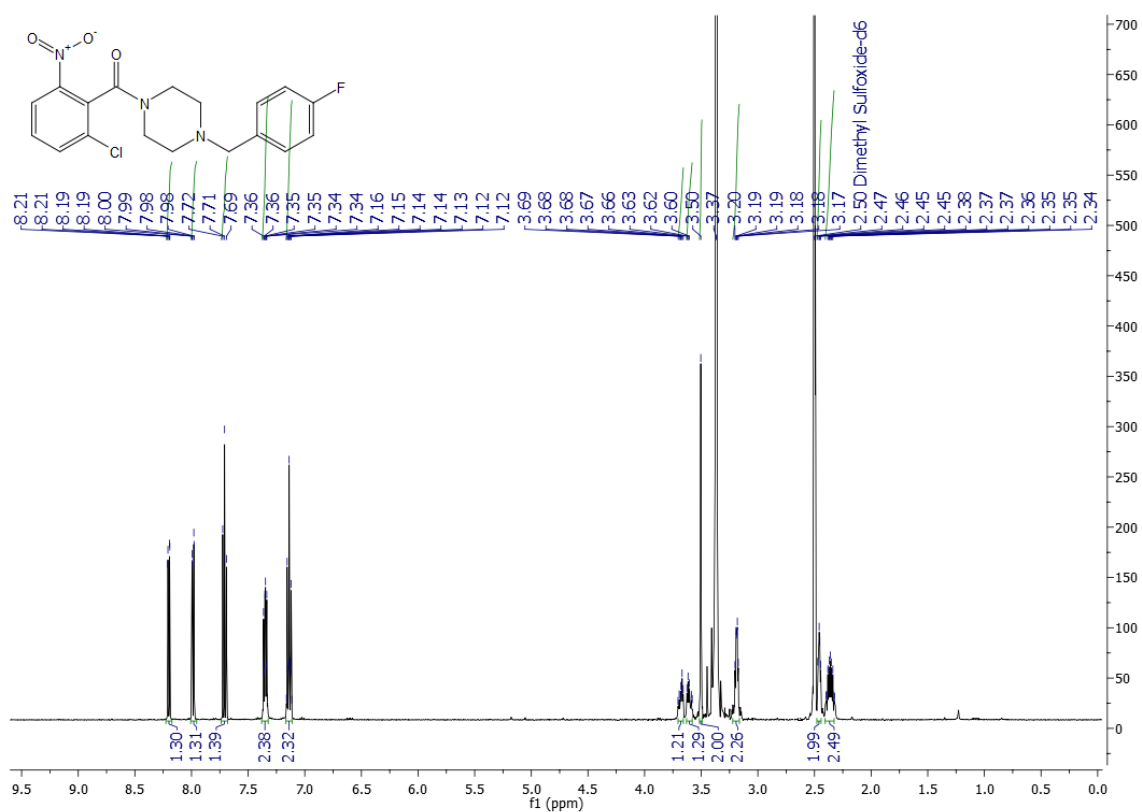

**Figure S37:** <sup>1</sup>H-NMR (DMSO-d<sub>6</sub>) spectrum of [4-(4-Fluorobenzyl)piperazin-1-yl]-(2-chloro-6-nitrophenyl)methanone (29)

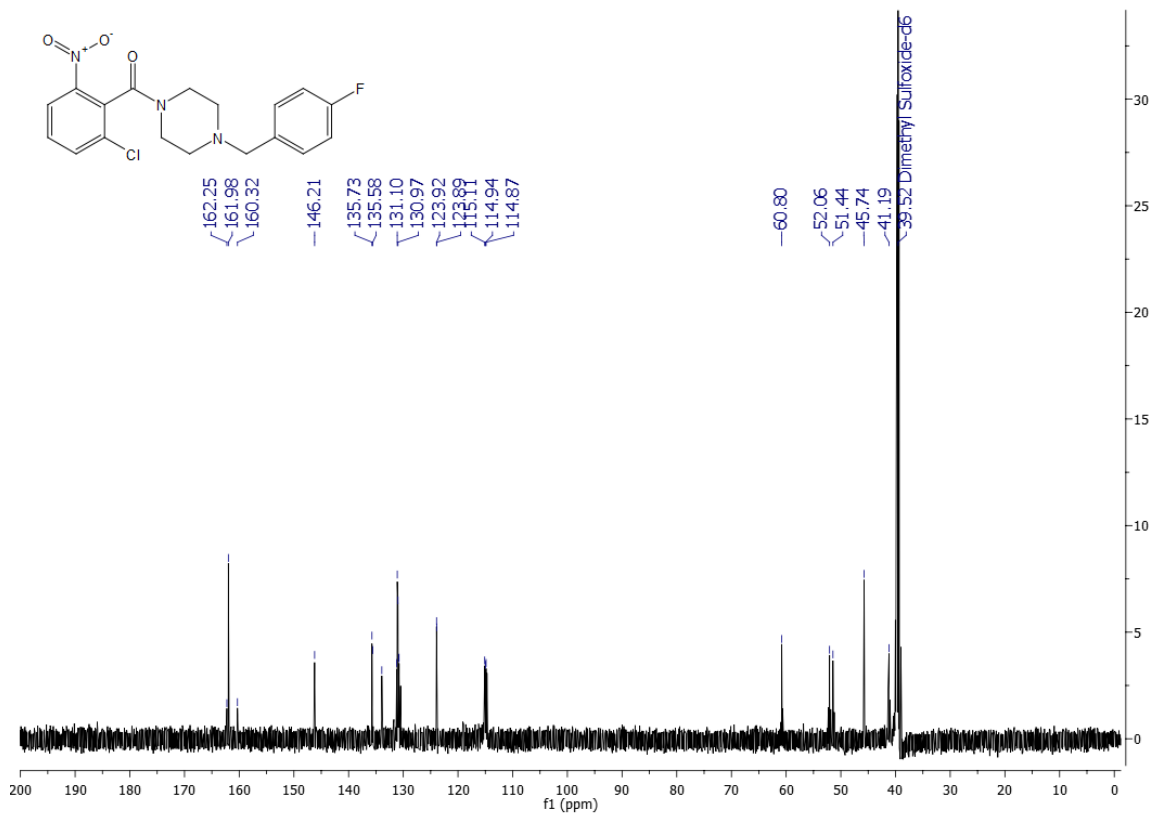

**Figure S38:** <sup>13</sup>C-NMR (DMSO-d<sub>6</sub>) spectrum of [4-(4-Fluorobenzyl)piperazin-1-yl]-(2-chloro-6-nitrophenyl)methanone (29)

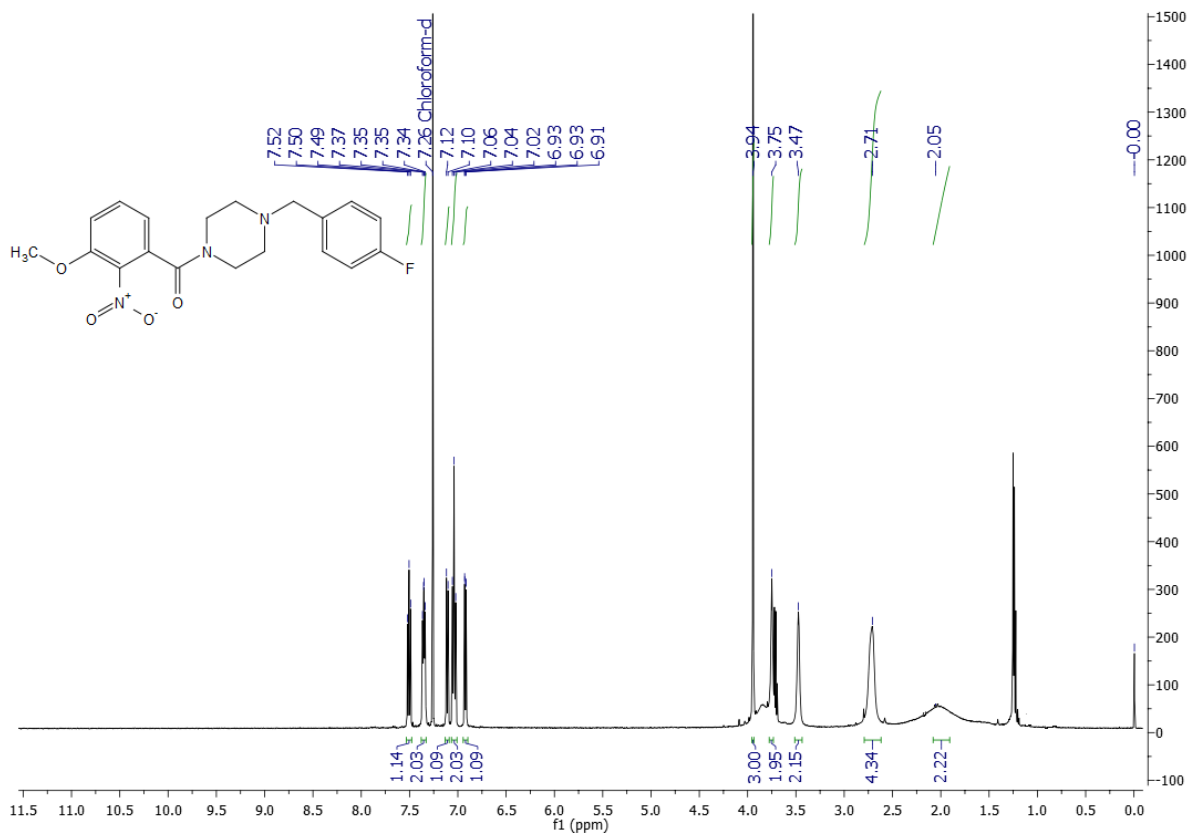

**Figure S39:** <sup>1</sup>H-NMR (CDCl<sub>3</sub>) spectrum of 1-[4-(4-Fluorobenzyl)piperazin-1-yl]-(3-methoxy-2-nitrophenyl)methanone (30)

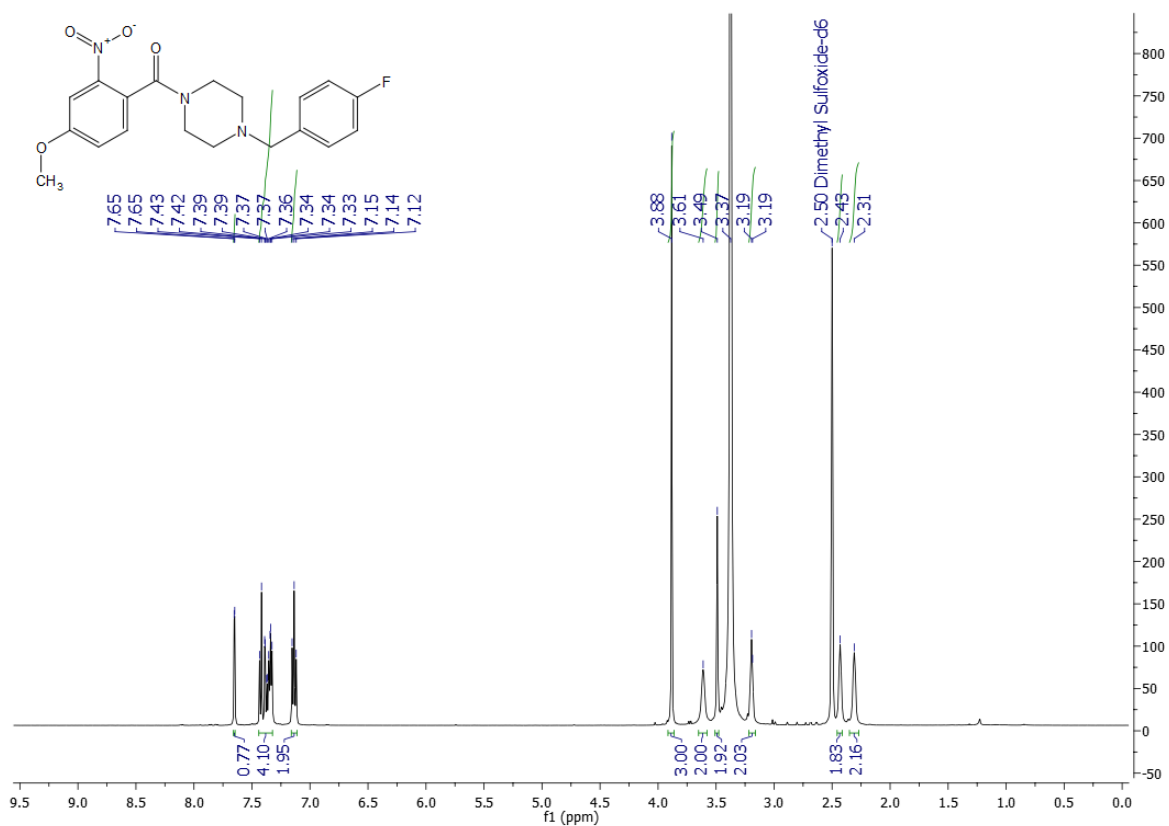

**Figure S40:**  $^1\text{H-NMR}$  (DMSO- $d_6$ ) spectrum of [4-(4-Fluorobenzyl)piperazin-1-yl]-(4-methoxy-2-nitrophenyl)methanone (**31**)

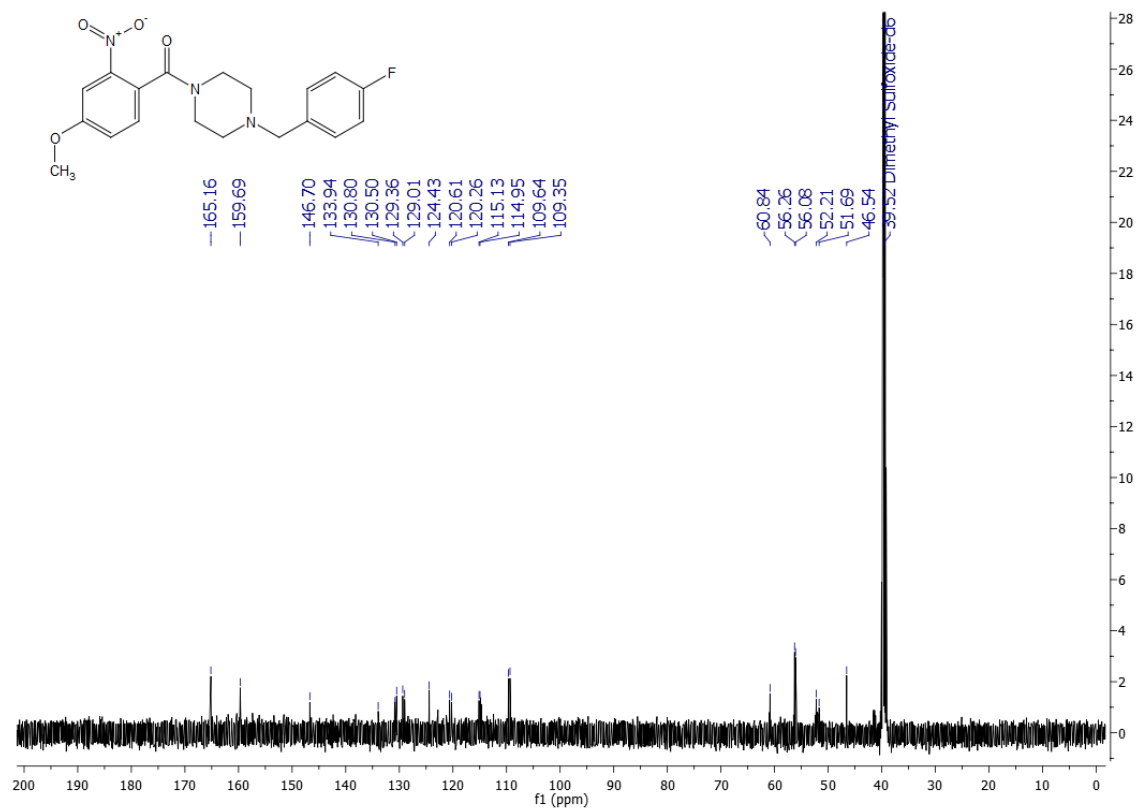

**Figure S41:**  $^{13}\text{C-NMR}$  (DMSO- $d_6$ ) spectrum of [4-(4-Fluorobenzyl)piperazin-1-yl]-(4-methoxy-2-nitrophenyl)methanone (**31**)

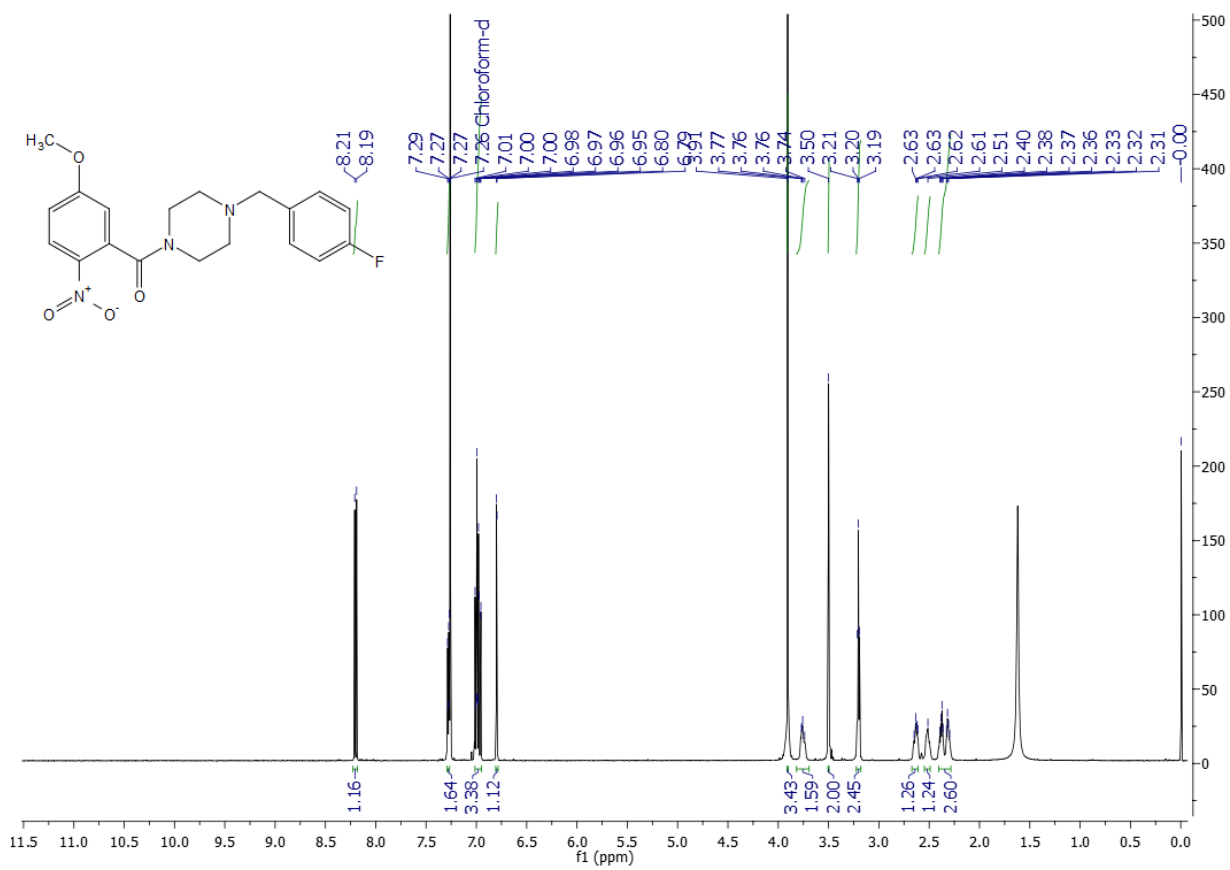

**Figure S42:** <sup>1</sup>H-NMR (CDCl<sub>3</sub>) spectrum of 1-[4-(4-Fluorobenzyl)piperazin-1-yl]-(5-methoxy-2-nitrophenyl)methanone (**32**)



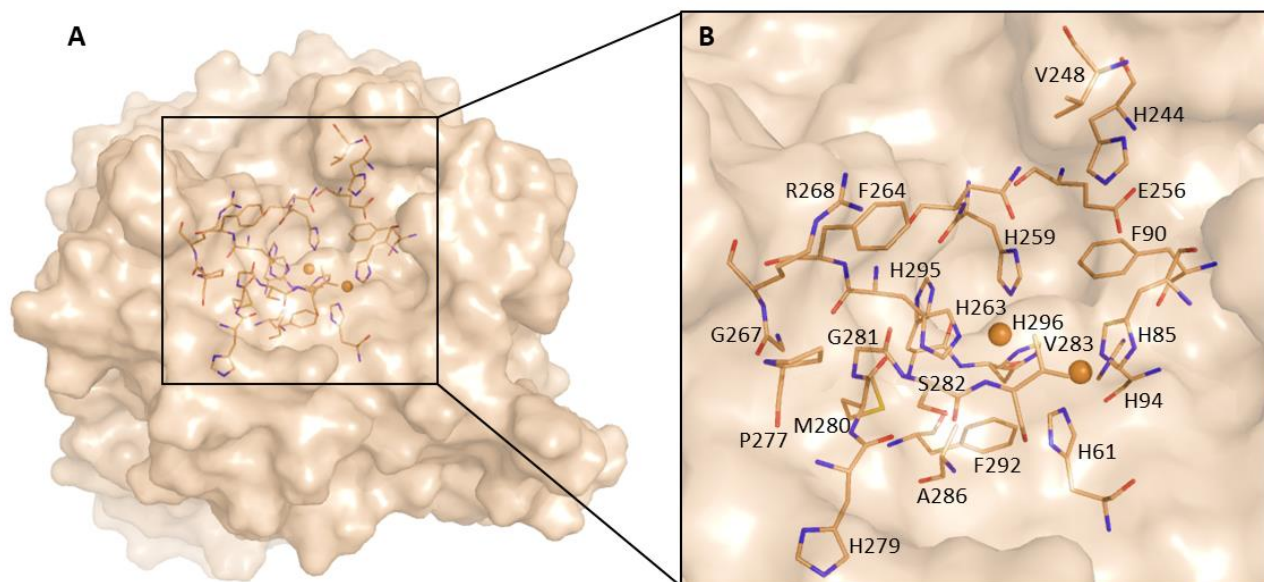

**Figure S43.** Representation of AbTYR binding site. A) AbTYR surface. The binding site defined for the docking calculation is lined by a black square. B) Close view of AbTYR binding site. The residues of the pocket are represented as wheat sticks.

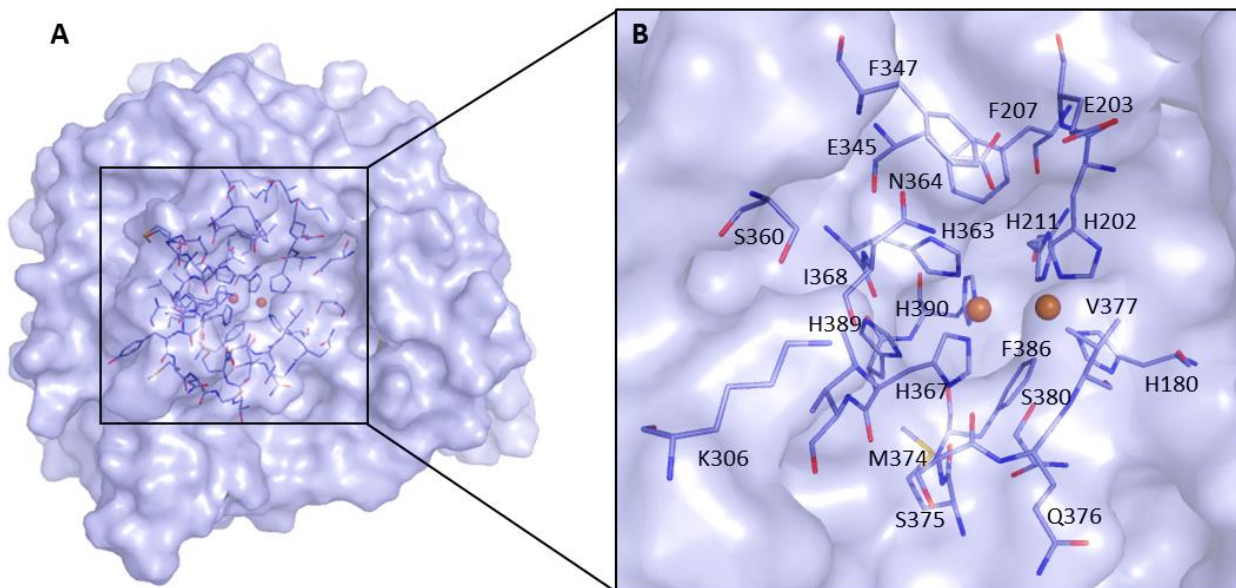

**Figure S44.** Representation of hTYR binding site. A) hTYR surface. The binding site defined for the docking calculation is lined by a black square. B) Close view of hTYR binding site. The residues of the pocket are represented as lightblue sticks.

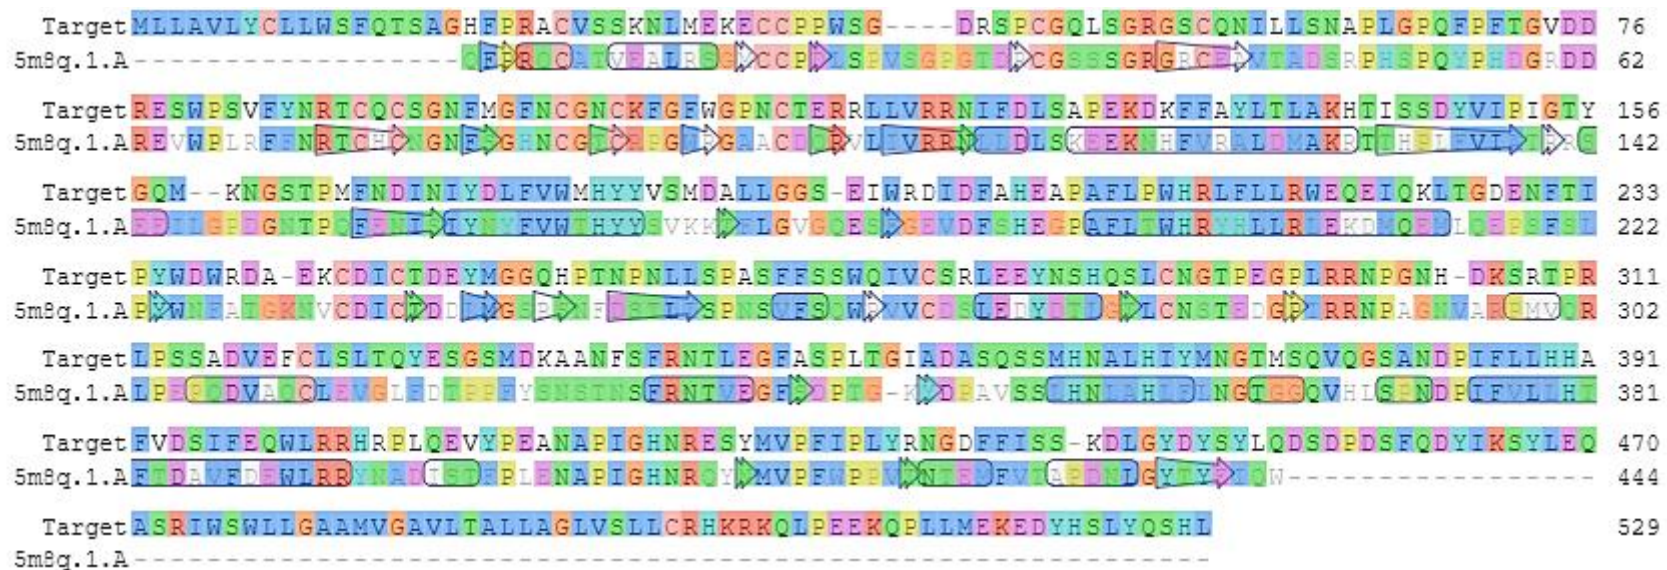

**Figure S45:** Sequence alignment of hTYR (target) and (TYRP-1) mutant (T391V-R374S-Y362F) 5m8q.

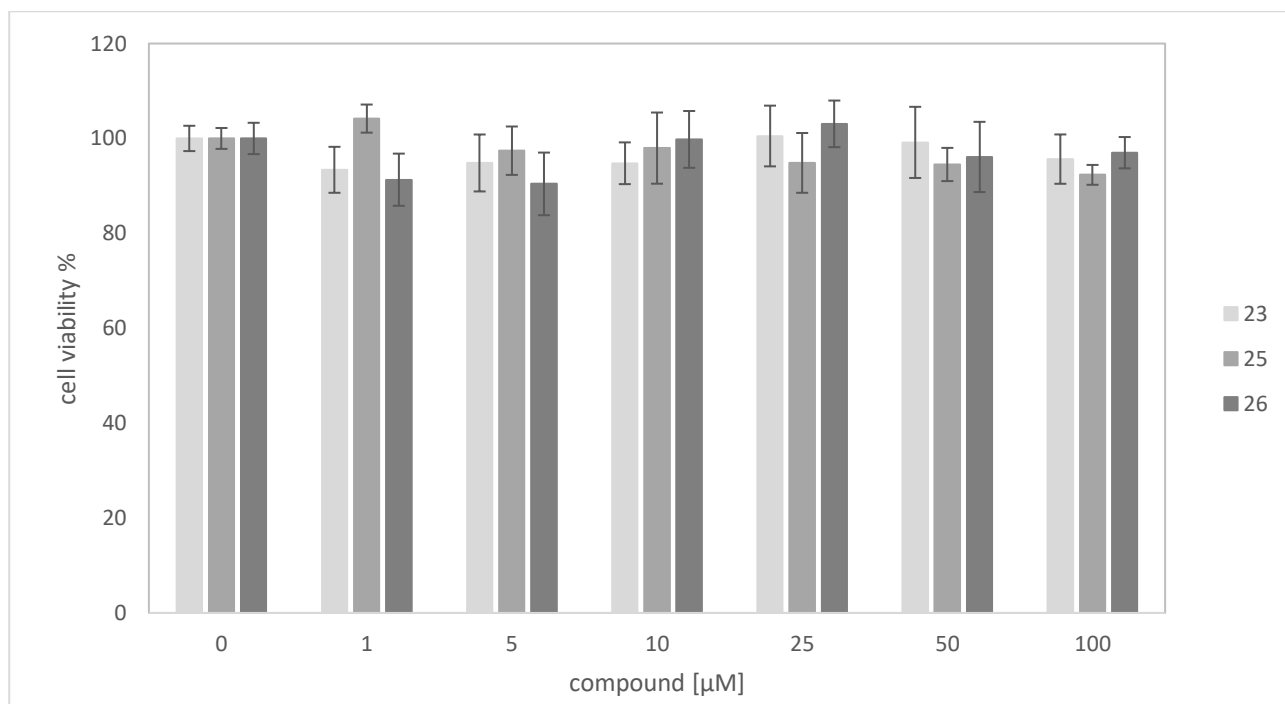

**Figure S46:** B16F10 melanoma cell viability after treatment with compounds **23**, **25** and **26**. The mean value and standard deviation were calculated from triplicate experiments.

**Table S1:** CAS numbers and smiles for compounds 7-32

| COMPOUND | CAS Number   | SMILES                                                             |
|----------|--------------|--------------------------------------------------------------------|
| 7.       | 423743-29-7  | <chem>Fc1ccc(CN2CCN(C(Cc3ccccc3)=O)CC2)cc1</chem>                  |
| 8.       | 439848-20-1  | <chem>Fc1ccc(CN2CCN(CC2)C(=O)CCc3ccccc3)cc1</chem>                 |
| 9.       | 423739-67-7  | <chem>Fc1ccc(CN2CCN(CC2)C(=O)C(c3ccccc3)c4ccccc4)cc1</chem>        |
| 10.      | 1387739-82-3 | <chem>Fc1ccc(CN2CCN(CC2)C(=O)Cc3ccccc3Cl)cc1</chem>                |
| 11.      | -            | <chem>Fc1ccc(CN2CCN(CC2)C(=O)Cc3cccc(Cl)c3)cc1</chem>              |
| 12.      | 1329294-83-8 | <chem>Fc1ccc(CN2CCN(CC2)C(=O)Cc3ccc(Cl)cc3)cc1</chem>              |
| 13.      | 1988172-38-8 | <chem>Fc1ccc(CN2CCN(CC2)C(=O)Cc3ccccc3Br)cc1</chem>                |
| 14.      | 1985981-75-6 | <chem>Fc1ccc(CN2CCN(CC2)C(=O)Cc3cccc(Br)c3)cc1</chem>              |
| 15.      | 1146917-07-8 | <chem>Fc1ccc(CN2CCN(CC2)C(=O)Cc3ccc(Br)cc3)cc1</chem>              |
| 16.      | -            | <chem>[O-][N+](=O)c1ccccc1CC(=O)N2CCN(Cc3ccc(F)cc3)CC2</chem>      |
| 17.      | -            | <chem>[O-][N+](=O)c1ccccc1CC(=O)N2CCN(Cc3ccc(F)cc3)CC2)c1</chem>   |
| 18.      | -            | <chem>[O-][N+](=O)c1ccc(CC(=O)N2CCN(Cc3ccc(F)cc3)CC2)cc1</chem>    |
| 19.      | 1796840-99-7 | <chem>COc1ccc(CC(=O)N2CCN(Cc3ccc(F)cc3)CC2)cc1</chem>              |
| 20.      | -            | <chem>Nc1ccccc1CC(=O)N2CCN(Cc3ccc(F)cc3)CC2</chem>                 |
| 21.      | -            | <chem>Nc1ccccc1CC(=O)N2CCN(Cc3ccc(F)cc3)CC2)c1</chem>              |
| 22.      | -            | <chem>Nc1ccc(CC(=O)N2CCN(Cc3ccc(F)cc3)CC2)cc1</chem>               |
| 23.      | -            | <chem>Fc1ccc(CN2CCN(CC2)C(=O)c3ccccc3C(F)(F)F)cc1</chem>           |
| 24.      | -            | <chem>Fc1ccc(CN2CCN(CC2)C(=O)c3ccc(F)cc3C(F)(F)F)cc1</chem>        |
| 25.      | -            | <chem>Fc1ccc(CN2CCN(CC2)C(=O)c3cc(F)ccc3C(F)(F)F)cc1</chem>        |
| 26.      | -            | <chem>[O-][N+](=O)c1c(Cl)cccc1C(=O)N2CCN(Cc3ccc(F)cc3)CC2</chem>   |
| 27.      | 2344352-87-8 | <chem>[O-][N+](=O)c1cc(Cl)ccc1C(=O)N2CCN(Cc3ccc(F)cc3)CC2</chem>   |
| 28.      | -            | <chem>[O-][N+](=O)c1ccc(Cl)cc1C(=O)N2CCN(Cc3ccc(F)cc3)CC2</chem>   |
| 29.      | -            | <chem>[O-][N+](=O)c1ccccc1c1C(=O)N2CCN(Cc3ccc(F)cc3)CC2</chem>     |
| 30.      | -            | <chem>COc1ccccc1C(=O)N2CCN(Cc3ccc(F)cc3)CC2)c1[N+](=O)[O-]</chem>  |
| 31.      | -            | <chem>COc1ccc(C(=O)N2CCN(Cc3ccc(F)cc3)CC2)c(c1)[N+](=O)[O-]</chem> |
| 32.      | 2345032-69-9 | <chem>COc1ccc(c(c1)C(=O)N2CCN(Cc3ccc(F)cc3)CC2)[N+](=O)[O-]</chem> |

**Table S2.** Selected physicochemical parameters, lipophilicity, solubility and drug-likeness for compound **7-32** predicted by SwissADME(<http://swissadme.ch/>), and Molinspiration tools(<https://molinspiration.com>).

| entry | MW (g/mol)* | TPSA* | TPSA** | iLogP* | miLogP** | Water solubility*  | Lipinski*                         | Ghose* | PAINS*                  |
|-------|-------------|-------|--------|--------|----------|--------------------|-----------------------------------|--------|-------------------------|
| 7     | 312.38      | 23.55 | 23.55  | 3.21   | 2.92     | Soluble            | Yes<br>0 violation                | Yes    | 0 alert                 |
| 8     | 326.41      | 23.55 | 23.55  | 3.54   | 3.44     | Soluble            | Yes<br>0 violation                | Yes    | 0 alert                 |
| 9     | 388.48      | 23.55 | 23.55  | 3.79   | 4.31     | Moderately soluble | Yes<br>0 violation                | Yes    | 0 alert                 |
| 10    | 346.83      | 23.55 | 23.55  | 3.44   | 3.55     | Soluble            | Yes<br>0 violation                | Yes    | 0 alert                 |
| 11    | 346.83      | 23.55 | 23.55  | 3.55   | 3.58     | Soluble            | Yes<br>0 violation                | Yes    | 0 alert                 |
| 12    | 346.83      | 23.55 | 23.55  | 3.52   | 3.60     | Soluble            | Yes<br>0 violation                | Yes    | 0 alert                 |
| 13    | 391.28      | 23.55 | 23.55  | 3.51   | 3.68     | Soluble            | Yes<br>0 violation                | Yes    | 0 alert                 |
| 14    | 391.28      | 23.55 | 23.55  | 3.64   | 3.71     | Soluble            | Yes<br>0 violation                | Yes    | 0 alert                 |
| 15    | 391.28      | 23.55 | 23.55  | 3.63   | 3.73     | Soluble            | Yes<br>0 violation                | Yes    | 0 alert                 |
| 16    | 357.38      | 69.37 | 69.37  | 2.83   | 2.83     | Soluble            | Yes<br>0 violation                | Yes    | 0 alert                 |
| 17    | 357.38      | 69.37 | 69.37  | 2.95   | 2.86     | Soluble            | Yes<br>0 violation                | Yes    | 0 alert                 |
| 18    | 357.38      | 69.37 | 69.37  | 2.92   | 2.88     | Soluble            | Yes<br>0 violation                | Yes    | 0 alert                 |
| 19    | 342.41      | 32.78 | 32.78  | 3.46   | 2.98     | Soluble            | Yes<br>0 violation                | Yes    | 0 alert                 |
| 20    | 327.40      | 49.57 | 49.57  | 2.92   | 2.36     | Soluble            | Yes<br>0 violation                | Yes    | 0 alert                 |
| 21    | 327.40      | 49.57 | 49.57  | 2.88   | 1.97     | Soluble            | Yes<br>0 violation                | Yes    | 0 alert                 |
| 22    | 327.40      | 49.57 | 49.57  | 2.78   | 2.00     | Soluble            | Yes<br>0 violation                | Yes    | 1 alert:<br>anil_no_alk |
| 23    | 384.34      | 23.55 | 23.55  | 3.27   | 3.32     | Soluble            | Yes<br>1 violation:<br>MLogP>4.15 | Yes    | 0 alert                 |
| 24    | 384.34      | 23.55 | 23.55  | 3.36   | 3.35     | Soluble            | Yes<br>1 violation:<br>MLogP>4.15 | Yes    | 0 alert                 |
| 25    | 384.34      | 23.55 | 23.55  | 3.34   | 3.35     | Soluble            | Yes<br>1 violation:<br>MLogP>4.15 | Yes    | 0 alert                 |

|           |        |       |       |      |      |                    |                    |     |         |
|-----------|--------|-------|-------|------|------|--------------------|--------------------|-----|---------|
| <b>26</b> | 377.80 | 69.37 | 69.37 | 2.84 | 2.90 | Moderately soluble | Yes<br>0 violation | Yes | 0 alert |
| <b>27</b> | 377.80 | 69.37 | 69.37 | 2.89 | 2.92 | Moderately soluble | Yes<br>0 violation | Yes | 0 alert |
| <b>28</b> | 377.80 | 69.37 | 69.37 | 2.89 | 2.92 | Moderately soluble | Yes<br>0 violation | Yes | 0 alert |
| <b>29</b> | 377.80 | 69.37 | 69.37 | 2.76 | 2.90 | Moderately soluble | Yes<br>0 violation | Yes | 0 alert |
| <b>30</b> | 373.38 | 78.60 | 78.61 | 2.66 | 2.28 | Soluble            | Yes<br>0 violation | Yes | 0 alert |
| <b>31</b> | 373.38 | 78.60 | 78.61 | 2.65 | 2.30 | Soluble            | Yes<br>0 violation | Yes | 0 alert |
| <b>32</b> | 373.38 | 78.60 | 78.61 | 2.72 | 2.30 | Soluble            | Yes<br>0 violation | Yes | 0 alert |

\***SwissADME** Water solubility: Soluble= *Log S (Ali)* values between -4 and -2; Moderately soluble= *Log S (Ali)* values between -6 and -4.

\*\***Molinspiration**
